# Supplementary material for: The photochemistry of rhenium(i) tricarbonyl N-heterocyclic carbene complexes
Source: Royal Society of Chemistry journal article supplement (doi:10.1039/c3dt51614h), 2013-01-01
Supplement: c3dt51614h.pdf [file c3dt51614h.pdf]

## The photochemistry of rhenium(I) tricarbonyl *N*-heterocyclic carbene complexes

Jamila G. Vaughan,<sup>a</sup> Brodie L. Reid,<sup>a</sup> Sushil Ramchandani,<sup>a</sup> Phillip J. Wright,<sup>a</sup> Sara Muzzioli,<sup>b</sup> Brian W. Skelton,<sup>c</sup> Paolo Raiteri,<sup>a</sup> David H. Brown,<sup>a,\*</sup> Stefano Stagni,<sup>b,\*</sup> Massimiliano Massi<sup>a,\*</sup>

<sup>a</sup> *Department of Chemistry – Curtin University, Kent Street, Bentley 6102 WA, Australia.*

<sup>b</sup> *Department of Industrial Chemistry “Toso Montanari” – University of Bologna, viale del Risorgimento 4, Bologna 40126, Italy.*

<sup>c</sup> *Centre for Microscopy, Characterisation and Analysis, University of Western Australia, Crawley 6009 WA, Australia.*

### Electronic Supplementary Information

#### Table of Content

|                                                                     |     |
|---------------------------------------------------------------------|-----|
| Bond Lengths and Angles Tables.....                                 | S2  |
| Excitation and Emission Profiles .....                              | S11 |
| Calculated Orbitals Contours .....                                  | S14 |
| Calculated Transitions .....                                        | S22 |
| <sup>1</sup> H-NMR Progressions for the Photochemical Studies ..... | S35 |

## Bond Lengths and Angles Tables

**Table S1.** Selected bond lengths and angles for **2Cl**

---

|                   |            |
|-------------------|------------|
| Re(1)-C(3)        | 1.9123(10) |
| Re(1)-C(2)        | 1.9169(11) |
| Re(1)-C(1)        | 1.9552(11) |
| Re(1)-C(12)       | 2.1488(10) |
| Re(1)-N(21)       | 2.2117(8)  |
| Re(1)-Cl(4)       | 2.4956(2)  |
| <br>              |            |
| C(3)-Re(1)-C(2)   | 88.78(5)   |
| C(3)-Re(1)-C(1)   | 91.37(4)   |
| C(2)-Re(1)-C(1)   | 87.66(4)   |
| C(3)-Re(1)-C(12)  | 95.71(4)   |
| C(2)-Re(1)-C(12)  | 99.91(4)   |
| C(1)-Re(1)-C(12)  | 169.71(4)  |
| C(3)-Re(1)-N(21)  | 93.78(4)   |
| C(2)-Re(1)-N(21)  | 173.94(4)  |
| C(1)-Re(1)-N(21)  | 97.76(4)   |
| C(12)-Re(1)-N(21) | 74.38(3)   |
| C(3)-Re(1)-Cl(4)  | 178.13(3)  |
| C(2)-Re(1)-Cl(4)  | 92.98(3)   |
| C(1)-Re(1)-Cl(4)  | 88.06(3)   |
| C(12)-Re(1)-Cl(4) | 84.62(3)   |
| N(21)-Re(1)-Cl(4) | 84.53(2)   |

---

**Table S2.** Selected bond lengths and angles for **2Br**

---

|                   |            |
|-------------------|------------|
| Re(1)-C(3)        | 1.917(4)   |
| Re(1)-C(2)        | 1.923(4)   |
| Re(1)-C(1)        | 1.957(3)   |
| Re(1)-C(12)       | 2.145(3)   |
| Re(1)-N(21)       | 2.210(3)   |
| Re(1)-Br(4)       | 2.6255(4)  |
|                   |            |
| C(3)-Re(1)-C(2)   | 89.42(15)  |
| C(3)-Re(1)-C(1)   | 92.06(14)  |
| C(2)-Re(1)-C(1)   | 87.94(14)  |
| C(3)-Re(1)-C(12)  | 96.25(13)  |
| C(2)-Re(1)-C(12)  | 100.14(13) |
| C(1)-Re(1)-C(12)  | 168.43(14) |
| C(3)-Re(1)-N(21)  | 93.24(13)  |
| C(2)-Re(1)-N(21)  | 174.42(12) |
| C(1)-Re(1)-N(21)  | 96.86(12)  |
| C(12)-Re(1)-N(21) | 74.70(12)  |
| C(3)-Re(1)-Br(4)  | 177.81(11) |
| C(2)-Re(1)-Br(4)  | 92.66(11)  |
| C(1)-Re(1)-Br(4)  | 87.32(10)  |
| C(12)-Re(1)-Br(4) | 84.07(9)   |
| N(21)-Re(1)-Br(4) | 84.75(7)   |

---

**Table S3.** Selected bond lengths and angles for **3Cl**

---

|                     |            |
|---------------------|------------|
| Re(1)-C(201)        | 1.908(4)   |
| Re(1)-C(101)        | 1.949(5)   |
| Re(1)-C(301)        | 1.977(6)   |
| Re(1)-C(2)          | 2.119(4)   |
| Re(1)-N(21)         | 2.277(3)   |
| Re(1)-Cl(1)         | 2.4799(13) |
|                     |            |
| C(201)-Re(1)-C(101) | 85.75(18)  |
| C(201)-Re(1)-C(301) | 91.65(19)  |
| C(101)-Re(1)-C(301) | 88.6(2)    |
| C(201)-Re(1)-C(2)   | 95.88(17)  |
| C(101)-Re(1)-C(2)   | 177.60(18) |
| C(301)-Re(1)-C(2)   | 89.60(19)  |
| C(201)-Re(1)-N(21)  | 168.61(17) |
| C(101)-Re(1)-N(21)  | 104.68(15) |
| C(301)-Re(1)-N(21)  | 93.14(16)  |
| C(2)-Re(1)-N(21)    | 73.84(14)  |
| C(201)-Re(1)-Cl(1)  | 92.14(16)  |
| C(101)-Re(1)-Cl(1)  | 93.60(14)  |
| C(301)-Re(1)-Cl(1)  | 175.74(13) |
| C(2)-Re(1)-Cl(1)    | 88.09(13)  |
| N(21)-Re(1)-Cl(1)   | 82.78(10)  |

---

**Table S4.** Selected bond lengths and angles for **3Br**

---

|                     |            |
|---------------------|------------|
| Re(1)-C(201)        | 1.913(4)   |
| Re(1)-C(101)        | 1.955(4)   |
| Re(1)-C(301)        | 2.058(5)   |
| Re(1)-C(2)          | 2.114(4)   |
| Re(1)-N(21)         | 2.275(3)   |
| Re(1)-Br(1)         | 2.6243(5)  |
|                     |            |
| C(201)-Re(1)-C(101) | 85.28(15)  |
| C(201)-Re(1)-C(301) | 92.03(18)  |
| C(101)-Re(1)-C(301) | 88.77(17)  |
| C(201)-Re(1)-C(2)   | 95.91(14)  |
| C(101)-Re(1)-C(2)   | 178.61(15) |
| C(301)-Re(1)-C(2)   | 90.46(17)  |
| C(201)-Re(1)-N(21)  | 168.85(14) |
| C(101)-Re(1)-N(21)  | 104.79(13) |
| C(301)-Re(1)-N(21)  | 92.97(13)  |
| C(2)-Re(1)-N(21)    | 74.10(11)  |
| C(201)-Re(1)-Br(1)  | 91.74(14)  |
| C(101)-Re(1)-Br(1)  | 94.00(12)  |
| C(301)-Re(1)-Br(1)  | 175.50(11) |
| C(2)-Re(1)-Br(1)    | 86.70(12)  |
| N(21)-Re(1)-Br(1)   | 82.90(8)   |

---

**Table S5.** Selected bond lengths and angles for *cis,cis*-[Re(CO)<sub>2</sub>(PyImPh)(NCCH<sub>3</sub>)Cl]

---

|                     |            |
|---------------------|------------|
| Re(1)-C(102)        | 1.886(3)   |
| Re(1)-C(101)        | 1.888(5)   |
| Re(1)-C(103)        | 1.937(14)  |
| Re(1)-C(2)          | 2.062(2)   |
| Re(1)-N(31)         | 2.119(2)   |
| Re(1)-N(21)         | 2.215(2)   |
| Re(1)-Cl(2)         | 2.416(4)   |
| Re(1)-Cl(1)         | 2.4914(12) |
|                     |            |
| C(102)-Re(1)-C(101) | 84.83(15)  |
| C(102)-Re(1)-C(103) | 90.8(5)    |
| C(102)-Re(1)-C(2)   | 98.38(9)   |
| C(101)-Re(1)-C(2)   | 91.70(14)  |
| C(103)-Re(1)-C(2)   | 90.5(4)    |
| C(102)-Re(1)-N(31)  | 94.10(9)   |
| C(101)-Re(1)-N(31)  | 90.06(14)  |
| C(103)-Re(1)-N(31)  | 88.7(4)    |
| C(2)-Re(1)-N(31)    | 167.50(9)  |
| C(102)-Re(1)-N(21)  | 172.96(9)  |
| C(101)-Re(1)-N(21)  | 93.89(14)  |
| C(103)-Re(1)-N(21)  | 90.7(5)    |
| C(2)-Re(1)-N(21)    | 74.71(8)   |
| N(31)-Re(1)-N(21)   | 92.83(8)   |
| C(102)-Re(1)-Cl(2)  | 91.26(13)  |
| C(103)-Re(1)-Cl(2)  | 177.4(4)   |
| C(2)-Re(1)-Cl(2)    | 90.87(11)  |
| N(31)-Re(1)-Cl(2)   | 89.49(10)  |
| N(21)-Re(1)-Cl(2)   | 87.52(12)  |
| C(102)-Re(1)-Cl(1)  | 95.12(8)   |
| C(101)-Re(1)-Cl(1)  | 177.13(13) |
| C(2)-Re(1)-Cl(1)    | 91.15(7)   |

|                   |          |
|-------------------|----------|
| N(31)-Re(1)-Cl(1) | 87.08(6) |
| N(21)-Re(1)-Cl(1) | 86.51(6) |

---

**Table S6.** Anisotropic displacement parameters ( $\text{\AA}^2 \times 10^3$ ) for *cis,cis*-[Re(CO)<sub>2</sub>(PyImPh)(NCCH<sub>3</sub>)Cl]; the anisotropic displacement factor exponent takes the form:  $-2 \square^2 [h^2 a^* 2 U^{11} + \dots + 2 h k a^* b^* U^{12}]$

|        | U <sup>11</sup> | U <sup>22</sup> | U <sup>33</sup> | U <sup>23</sup> | U <sup>13</sup> | U <sup>12</sup> |
|--------|-----------------|-----------------|-----------------|-----------------|-----------------|-----------------|
| Re(1)  | 22(1)           | 20(1)           | 15(1)           | 1(1)            | 8(1)            | 0(1)            |
| Cl(1)  | 21(1)           | 27(1)           | 23(1)           | 4(1)            | 8(1)            | -2(1)           |
| C(103) | 27(7)           | 34(7)           | 30(6)           | 4(5)            | 8(6)            | -6(5)           |
| O(103) | 27(6)           | 52(6)           | 48(6)           | 16(5)           | 13(5)           | -6(5)           |
| C(101) | 27(2)           | 19(2)           | 20(2)           | 1(1)            | 10(2)           | -1(2)           |
| O(101) | 25(1)           | 33(2)           | 31(1)           | 1(1)            | 7(1)            | -10(1)          |
| Cl(2)  | 29(2)           | 40(2)           | 25(2)           | 4(1)            | 10(2)           | -5(2)           |
| C(102) | 29(1)           | 30(1)           | 17(1)           | -2(1)           | 9(1)            | -2(1)           |
| O(102) | 53(1)           | 22(1)           | 35(1)           | -1(1)           | 13(1)           | 4(1)            |
| N(1)   | 23(1)           | 21(1)           | 17(1)           | 2(1)            | 10(1)           | 0(1)            |
| C(11)  | 26(1)           | 24(1)           | 15(1)           | 1(1)            | 6(1)            | 3(1)            |
| C(12)  | 29(1)           | 37(1)           | 26(1)           | 6(1)            | 13(1)           | 8(1)            |
| C(13)  | 41(2)           | 51(2)           | 29(1)           | 5(1)            | 13(1)           | 22(1)           |
| C(14)  | 58(2)           | 30(1)           | 25(1)           | 1(1)            | 6(1)            | 17(1)           |
| C(15)  | 50(2)           | 23(1)           | 26(1)           | 1(1)            | 4(1)            | 0(1)            |
| C(16)  | 30(1)           | 26(1)           | 22(1)           | 3(1)            | 6(1)            | -2(1)           |
| C(2)   | 20(1)           | 21(1)           | 17(1)           | 1(1)            | 7(1)            | -1(1)           |
| N(21)  | 21(1)           | 20(1)           | 19(1)           | 2(1)            | 6(1)            | -2(1)           |
| C(22)  | 21(1)           | 19(1)           | 21(1)           | 1(1)            | 6(1)            | -2(1)           |
| C(23)  | 32(1)           | 19(1)           | 29(1)           | -1(1)           | 11(1)           | 0(1)            |
| C(24)  | 33(1)           | 19(1)           | 36(1)           | 2(1)            | 8(1)            | 2(1)            |
| C(25)  | 34(1)           | 25(1)           | 30(1)           | 9(1)            | 7(1)            | 1(1)            |
| C(26)  | 30(1)           | 25(1)           | 21(1)           | 5(1)            | 6(1)            | -1(1)           |
| N(3)   | 24(1)           | 19(1)           | 17(1)           | 1(1)            | 8(1)            | -1(1)           |
| C(4)   | 27(1)           | 24(1)           | 19(1)           | -4(1)           | 11(1)           | -4(1)           |
| C(5)   | 26(1)           | 27(1)           | 17(1)           | -1(1)           | 9(1)            | -1(1)           |
| N(31)  | 26(1)           | 26(1)           | 20(1)           | -1(1)           | 9(1)            | -3(1)           |
| C(31)  | 32(1)           | 28(1)           | 21(1)           | 1(1)            | 10(1)           | -5(1)           |
| C(32)  | 42(2)           | 48(2)           | 19(1)           | 0(1)            | 11(1)           | -9(1)           |
| N(41)  | 72(2)           | 54(2)           | 46(2)           | 10(1)           | 35(2)           | 25(2)           |
| C(41)  | 56(2)           | 21(1)           | 24(1)           | 3(1)            | 12(1)           | 4(1)            |
| C(42)  | 87(3)           | 73(3)           | 44(2)           | 7(2)            | 6(2)            | -47(3)          |



**Table S7.** Selected bond lengths and angles for *cis,cis*-[Re(CO)<sub>2</sub>(PyImPh)Br(P(OEt)<sub>3</sub>)]

---

|                   |            |
|-------------------|------------|
| Re(1)-C(20)       | 1.890(4)   |
| Re(1)-C(10)       | 1.899(4)   |
| Re(1)-C(2)        | 2.117(4)   |
| Re(1)-N(22)       | 2.236(3)   |
| Re(1)-P(1)        | 2.3457(10) |
| Re(1)-Br(1)       | 2.6557(4)  |
| <br>              |            |
| C(20)-Re(1)-C(10) | 87.45(16)  |
| C(20)-Re(1)-C(2)  | 101.57(15) |
| C(10)-Re(1)-C(2)  | 94.62(15)  |
| C(20)-Re(1)-N(22) | 174.12(14) |
| C(10)-Re(1)-N(22) | 96.94(14)  |
| C(2)-Re(1)-N(22)  | 74.25(13)  |
| C(20)-Re(1)-P(1)  | 87.15(12)  |
| C(10)-Re(1)-P(1)  | 91.45(11)  |
| C(2)-Re(1)-P(1)   | 169.56(10) |
| N(22)-Re(1)-P(1)  | 96.61(9)   |
| C(20)-Re(1)-Br(1) | 91.50(12)  |
| C(10)-Re(1)-Br(1) | 176.42(11) |
| C(2)-Re(1)-Br(1)  | 82.23(10)  |
| N(22)-Re(1)-Br(1) | 83.88(8)   |
| P(1)-Re(1)-Br(1)  | 91.92(2)   |

---

**Table S8.** Selected bond lengths and angles for *cis,trans*-[Re(CO)<sub>2</sub>(PyImPh)Br(P(OEt)<sub>3</sub>)]

---

|                     |            |
|---------------------|------------|
| Re(1)-C(102)        | 1.907(6)   |
| Re(1)-C(101)        | 1.927(6)   |
| Re(1)-C(2)          | 2.140(5)   |
| Re(1)-N(21)         | 2.209(5)   |
| Re(1)-P(1)          | 2.2793(16) |
| Re(1)-Br(1)         | 2.6602(6)  |
| <br>                |            |
| C(102)-Re(1)-C(101) | 88.2(2)    |
| C(102)-Re(1)-C(2)   | 103.7(2)   |
| C(101)-Re(1)-C(2)   | 167.3(2)   |
| C(102)-Re(1)-N(21)  | 176.0(2)   |
| C(101)-Re(1)-N(21)  | 94.3(2)    |
| C(2)-Re(1)-N(21)    | 74.18(19)  |
| C(102)-Re(1)-P(1)   | 91.89(18)  |
| C(101)-Re(1)-P(1)   | 86.38(17)  |
| C(2)-Re(1)-P(1)     | 88.61(15)  |
| N(21)-Re(1)-P(1)    | 91.49(12)  |
| C(102)-Re(1)-Br(1)  | 90.97(18)  |
| C(101)-Re(1)-Br(1)  | 97.39(16)  |
| C(2)-Re(1)-Br(1)    | 87.14(14)  |
| N(21)-Re(1)-Br(1)   | 85.52(12)  |
| P(1)-Re(1)-Br(1)    | 175.34(4)  |

---

## Excitation and Emission Profiles

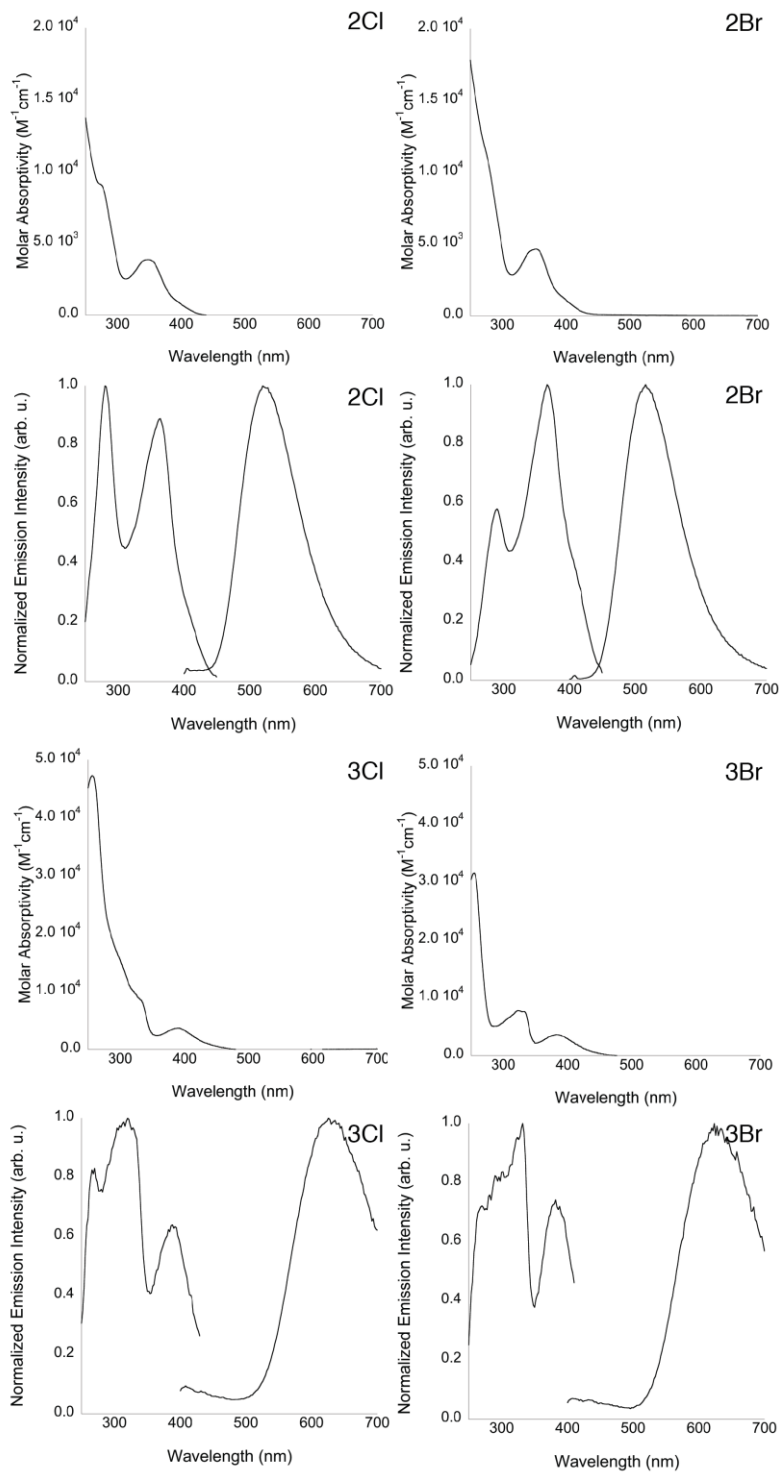

**Figure S1.** Absorption, excitation and emission profiles for all the complexes from a ca.  $10^{-5}$  M solution in dichloromethane.

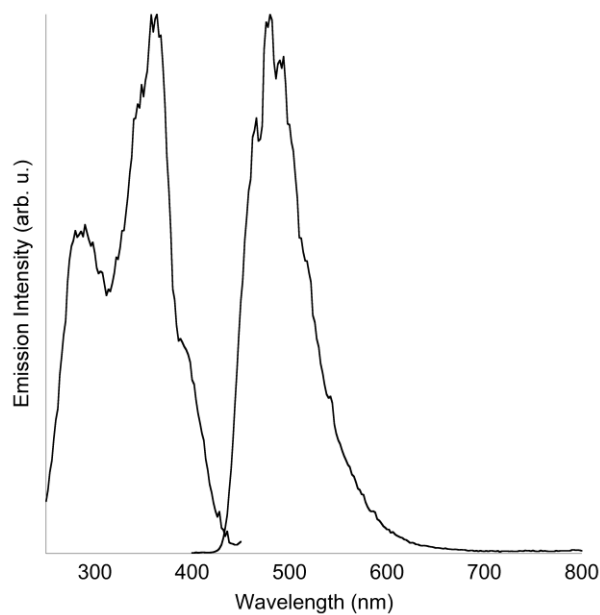

**Figure S2.** Excitation and emission profiles for **2Cl** at 77 K from a ca.  $10^{-5}$  M solution in dichloromethane.

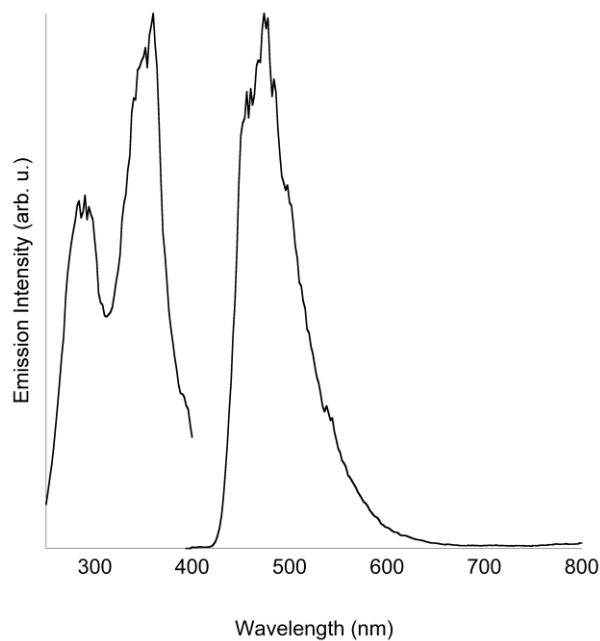

**Figure S3.** Excitation and emission profiles for **2Br** at 77 K from a ca.  $10^{-5}$  M solution in dichloromethane.

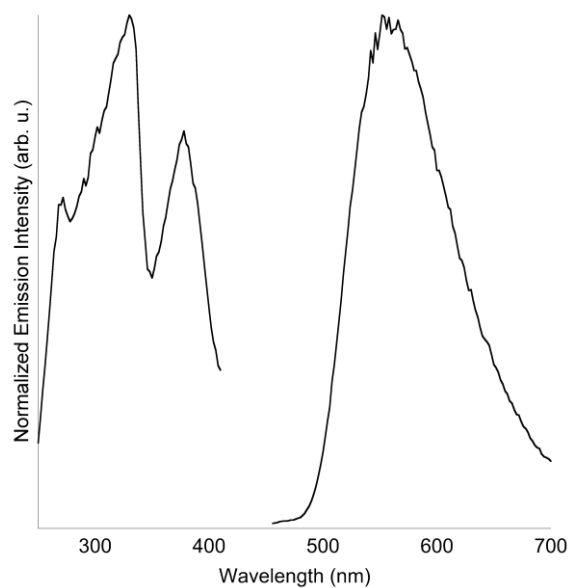

**Figure S4.** Excitation and emission profiles for **3Cl** at 77 K from a ca.  $10^{-5}$  M solution in dichloromethane.

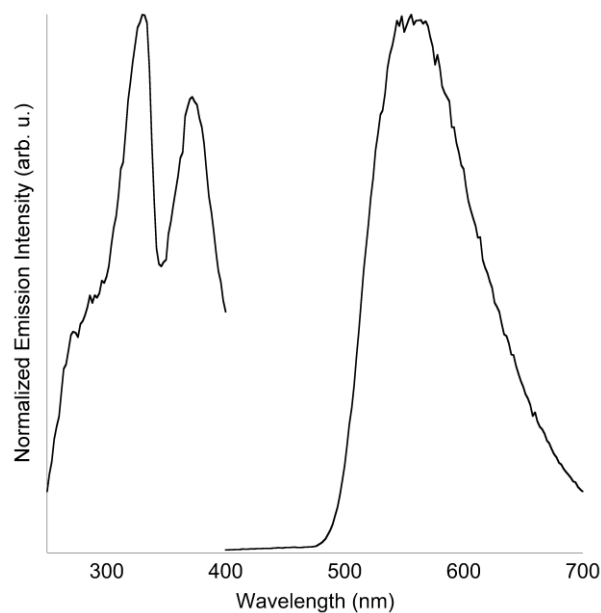

**Figure S5.** Excitation and emission profiles for **3Br** at 77 K from a ca.  $10^{-5}$  M solution in dichloromethane.

### Calculated Orbitals Contours

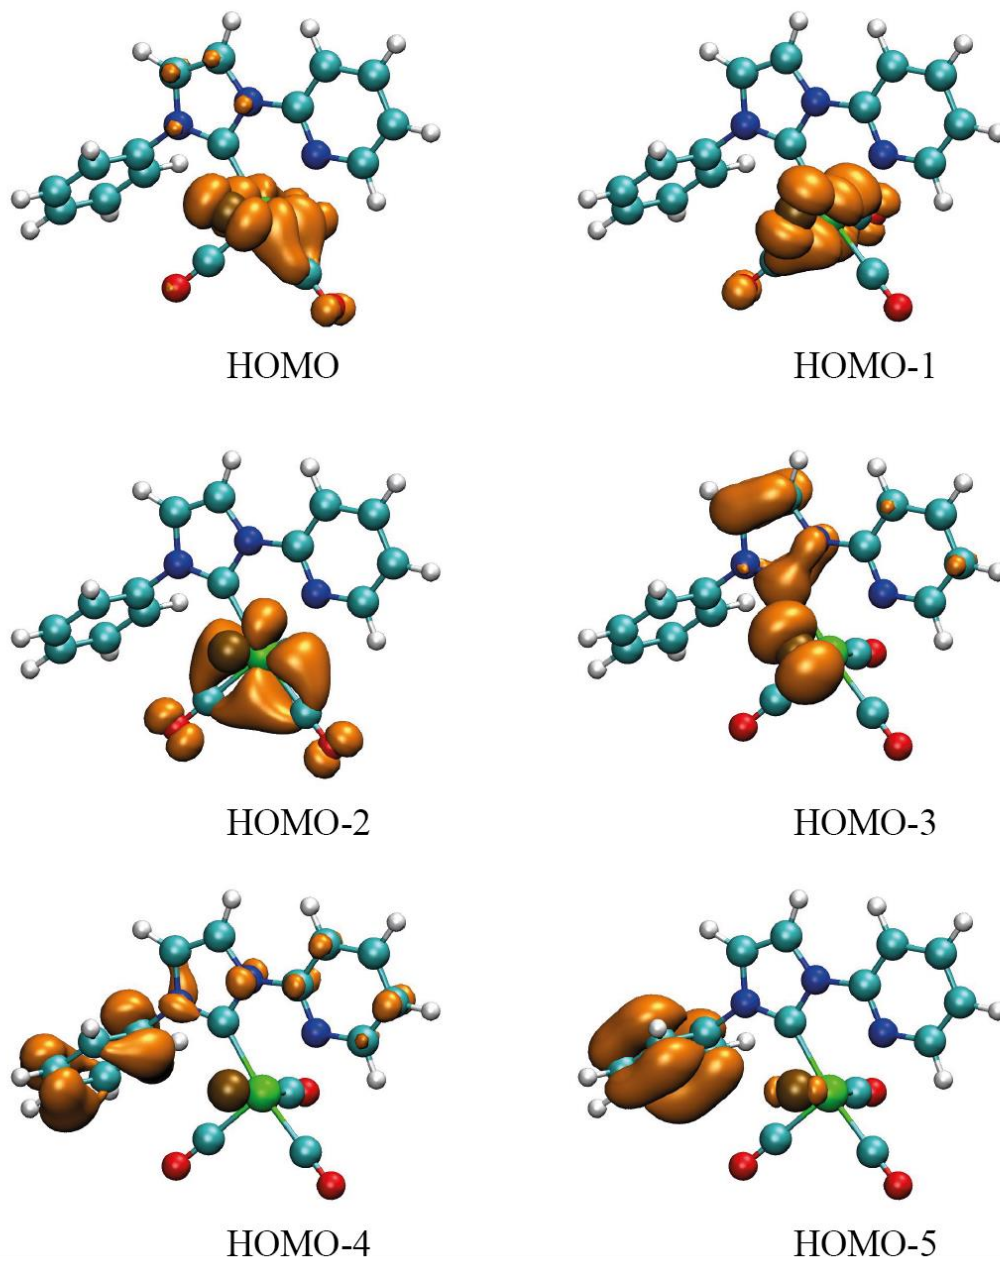

**Figure S6.** Selected occupied orbital contours of 2Cl.

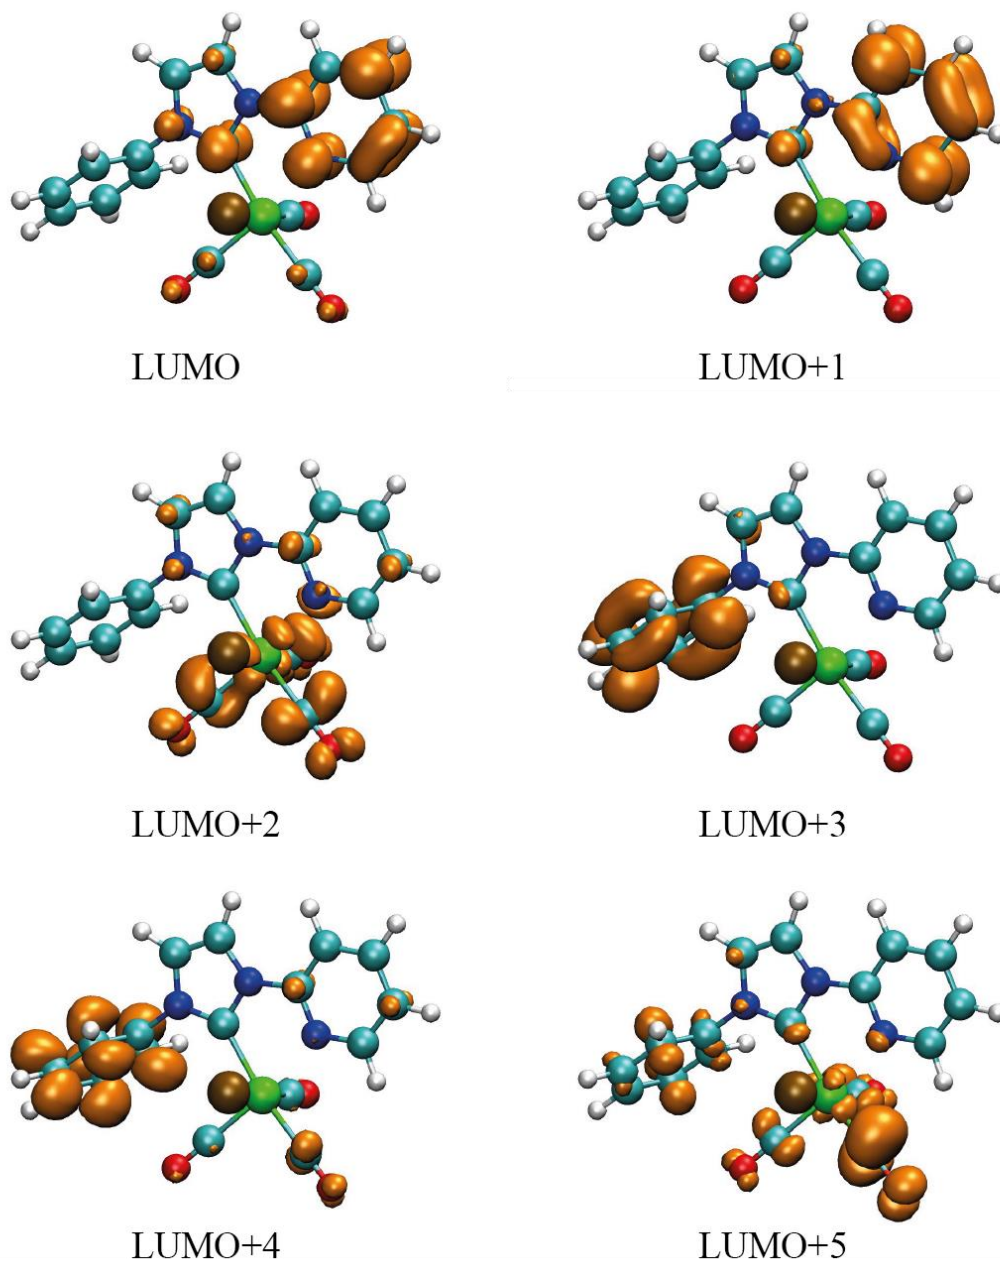

**Figure S7.** Selected unoccupied orbital contours of **2Cl**.

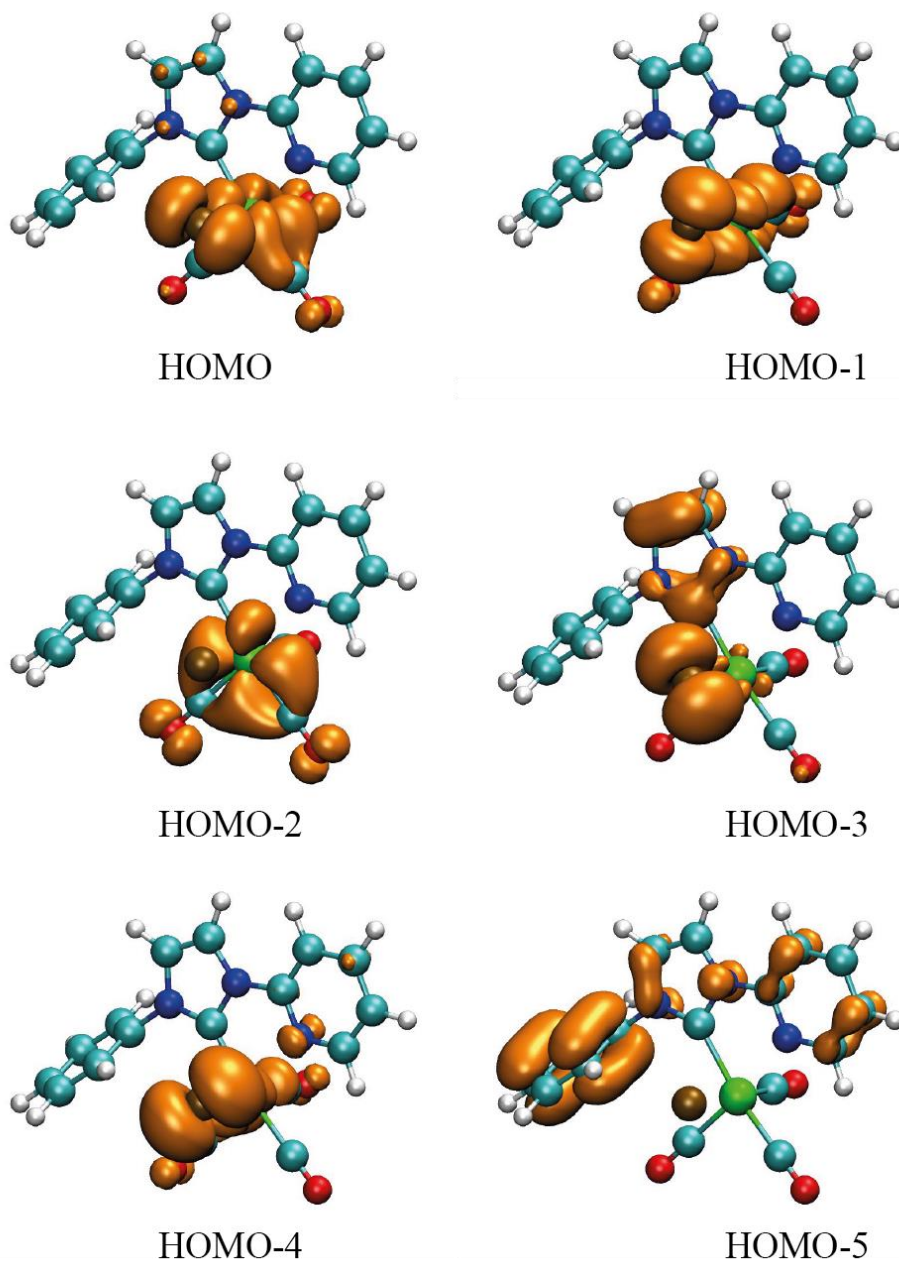

**Figure S8.** Selected occupied orbital contours of **2Br**.



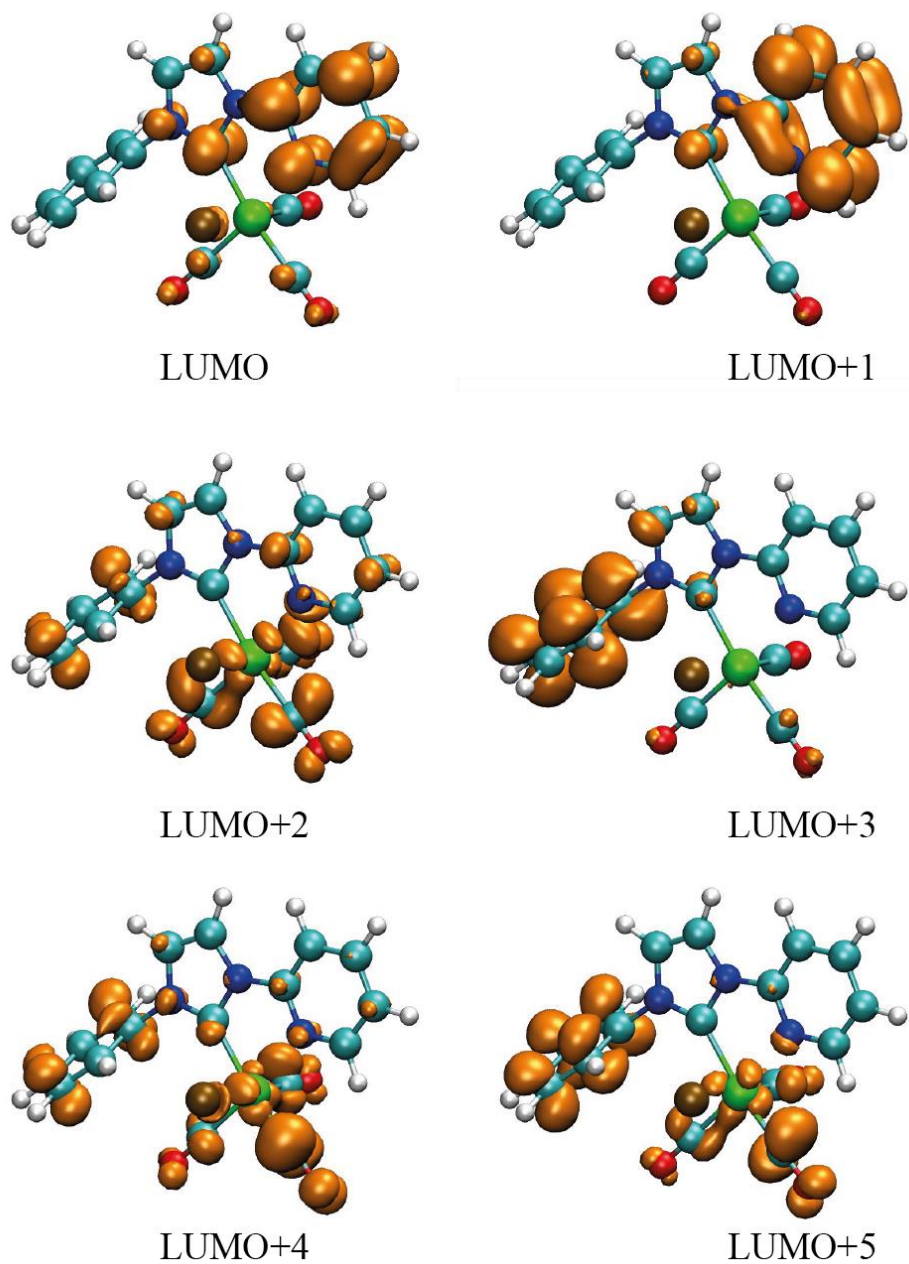

**Figure S9.** Selected unoccupied orbital contours of **2Br**.

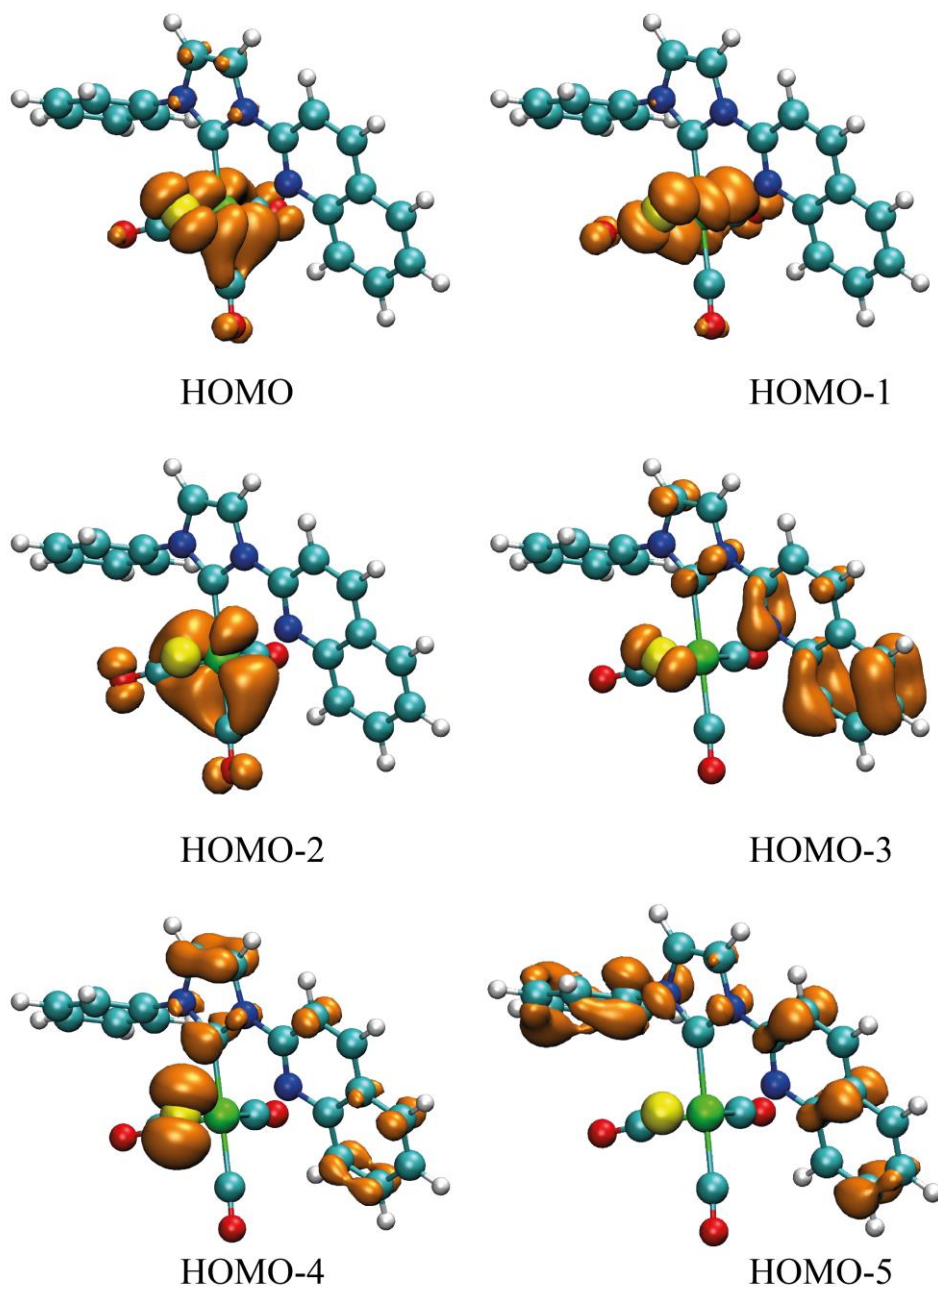

**Figure S10.** Selected occupied orbitals contours of **3Cl**.

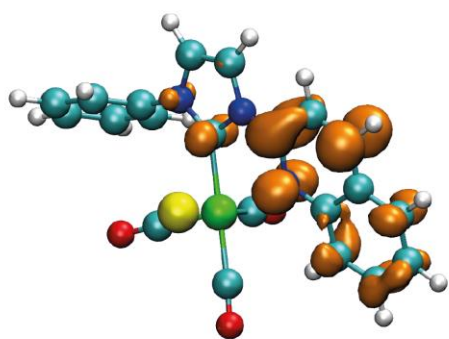

LUMO

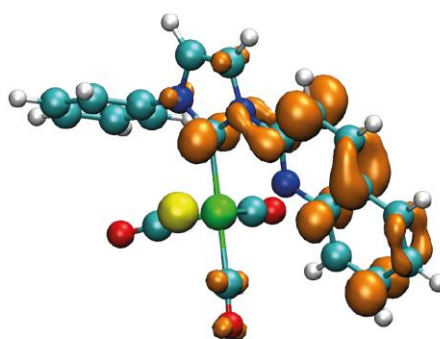

LUMO+1

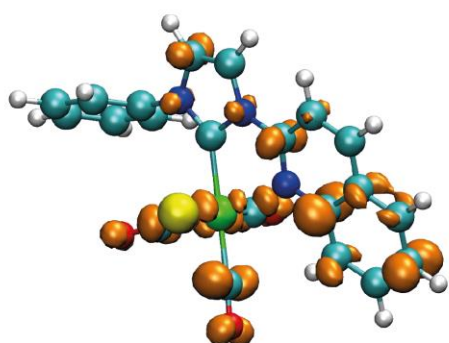

LUMO+2

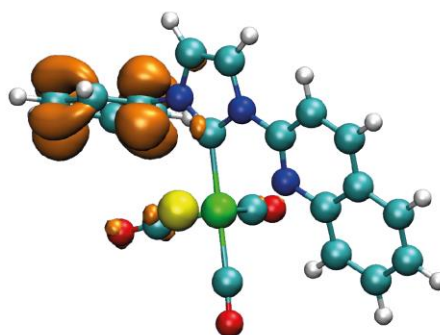

LUMO+3

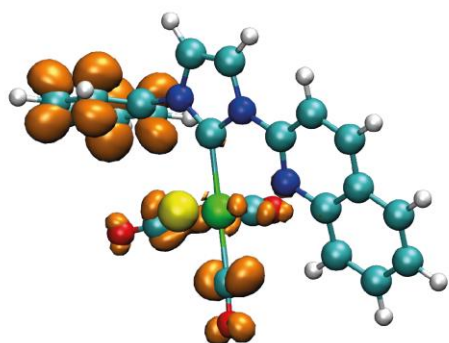

LUMO+4

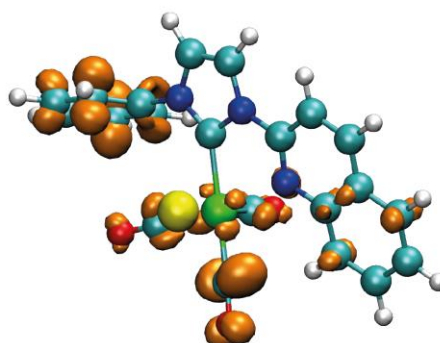

LUMO+5

**Figure S11.** Selected unoccupied orbitals contours of **3Cl**.

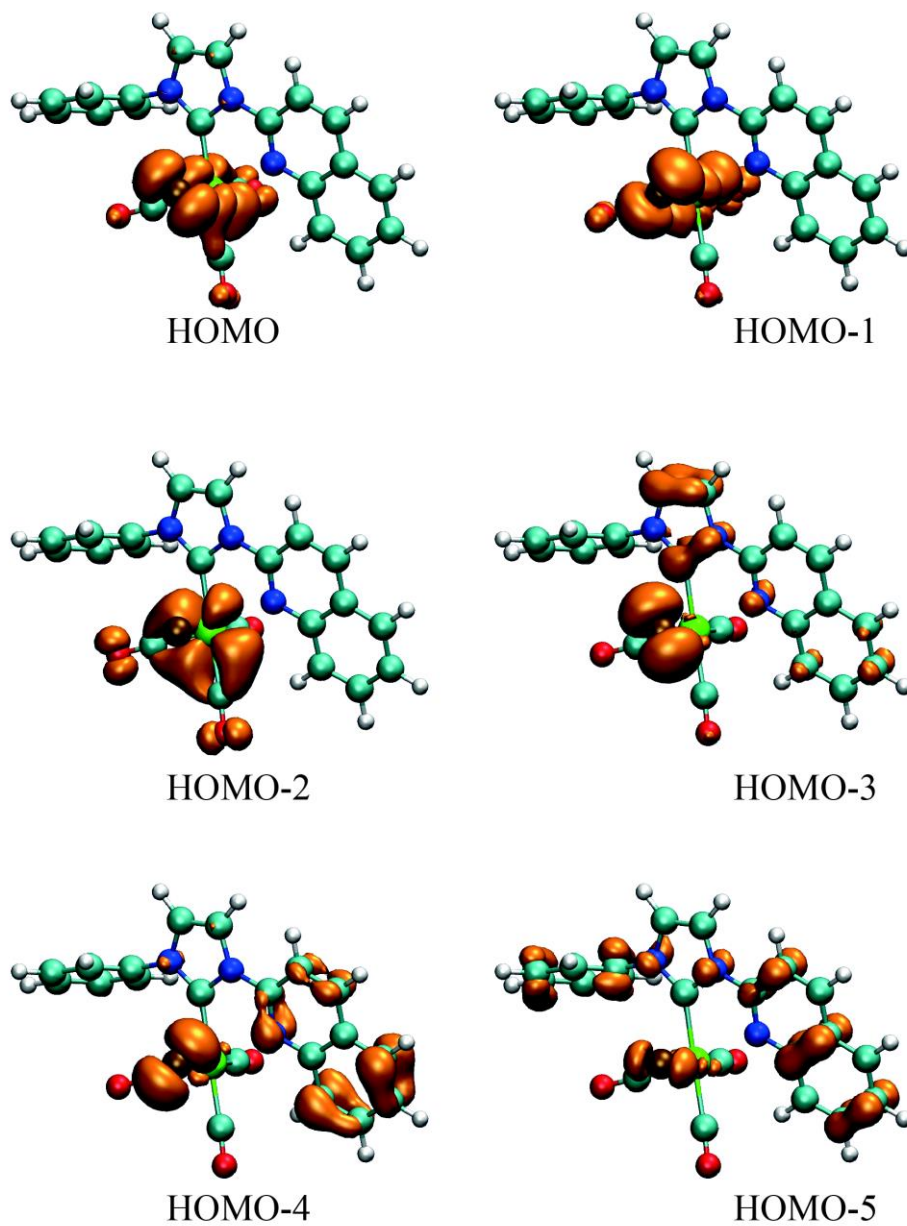

**Figure S12.** Selected occupied orbital contours of **3Br**.

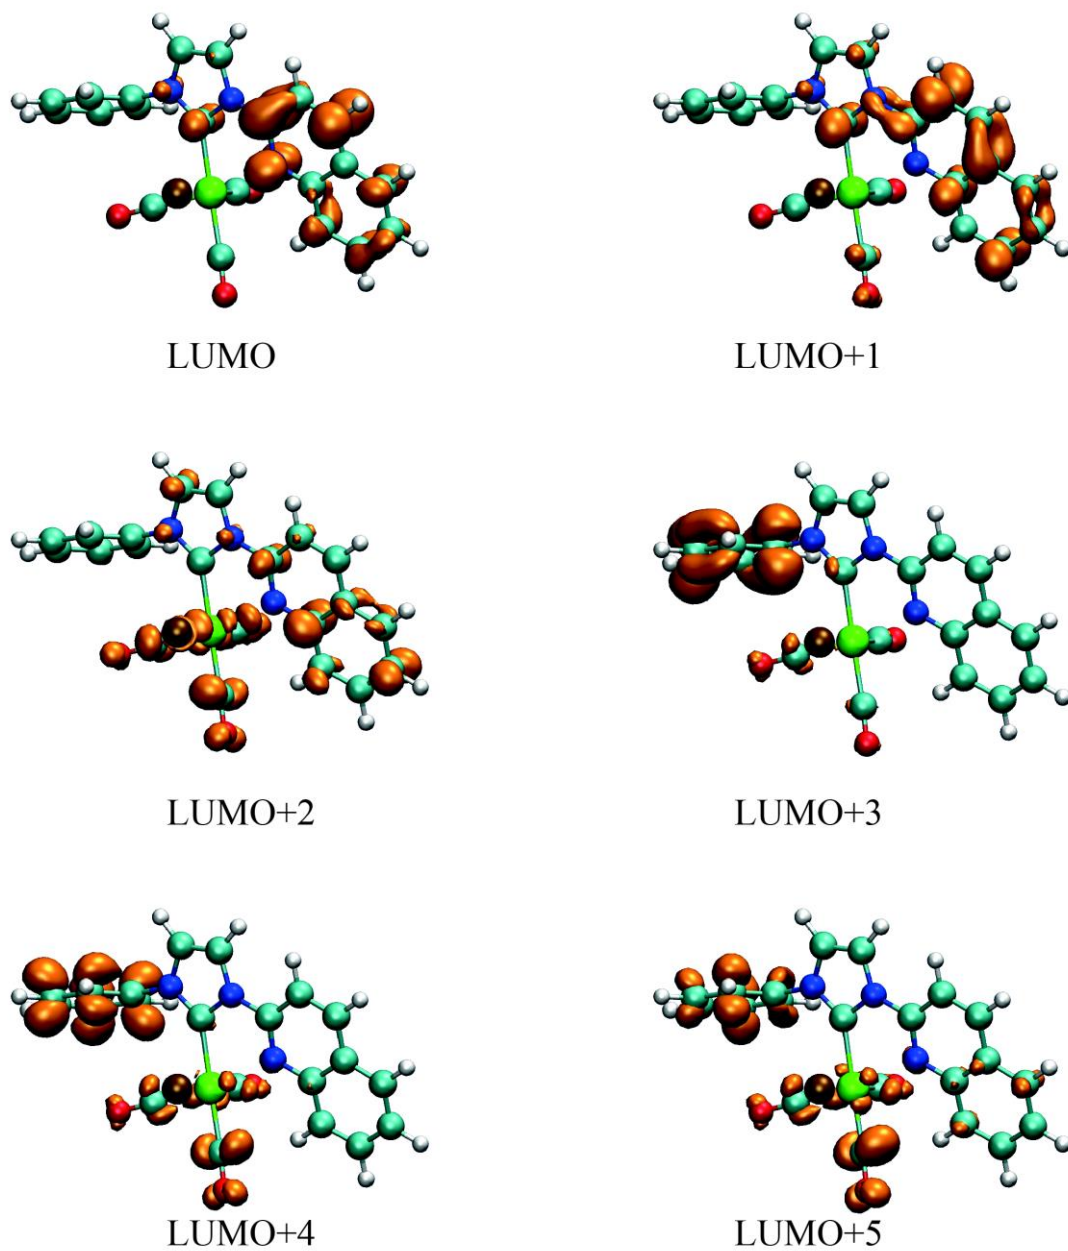

**Figure S13.** Selected unoccupied orbital contours of **3Br**.

### Calculated Transitions

**Table S9.** Calculated transitions for **2CI**

| Wavelength | Intensity | Levels           | Character |
|------------|-----------|------------------|-----------|
| 399.47 nm  | 0.0107    | HOMO -> LUMO     | 96.5 %    |
| 376.08 nm  | 0.1112    | HOMO-1 -> LUMO   | 95.0 %    |
| 354.04 nm  | 0.0021    | HOMO-2 -> LUMO   | 96.4 %    |
| 327.41 nm  | 0.0309    | HOMO -> LUMO+1   | 96.6 %    |
| 316.59 nm  | 0.0116    | HOMO-1 -> LUMO+1 | 95.8 %    |
| 301.27 nm  | 0.0085    | HOMO -> LUMO+2   | 83.5 %    |
| 293.46 nm  | 0.0007    | HOMO-2 -> LUMO+1 | 73.7 %    |
|            |           | HOMO-1 -> LUMO+2 | 12.8 %    |
| 292.70 nm  | 0.0063    | HOMO-2 -> LUMO+1 | 19.8 %    |
|            |           | HOMO-1 -> LUMO+2 | 48.7 %    |
| 290.22 nm  | 0.0512    | HOMO-3 -> LUMO   | 91.6 %    |
| 281.10 nm  | 0.0204    | HOMO-1 -> LUMO+2 | 10.6 %    |
| 273.68 nm  | 0.0147    | HOMO-1 -> LUMO+2 | 13.8 %    |
| 270.05 nm  | 0.0061    | HOMO -> LUMO+3   | 75.1 %    |

|           |        |                  |        |
|-----------|--------|------------------|--------|
| 269.74 nm | 0.0377 | HOMO-6 -> LUMO   | 59.4 % |
|           |        | HOMO-2 -> LUMO+2 | 11.2 % |
| 267.92 nm | 0.0047 | HOMO-6 -> LUMO   | 13.8 % |
|           |        | HOMO-2 -> LUMO+2 | 52.4 % |
| 265.94 nm | 0.2067 | HOMO-4 -> LUMO   | 77.7 % |
| 262.54 nm | 0.0082 | HOMO-1 -> LUMO+3 | 82.4 % |
| 260.99 nm | 0.0041 | HOMO-6 -> LUMO   | 11.7 % |
| 258.93 nm | 0.0021 | HOMO-5 -> LUMO   | 84.3 % |
| 254.76 nm | 0.0079 | HOMO-7 -> LUMO   | 31.1 % |
| 253.60 nm | 0.0370 | HOMO-3 -> LUMO+1 | 20.8 % |

**Table S10.** Calculated transitions for **2Br**

| Wavelength | Intensity | Levels           | Character |
|------------|-----------|------------------|-----------|
| 404.80 nm  | 0.0073    | HOMO -> LUMO     | 97.1 %    |
| 384.74 nm  | 0.0774    | HOMO-1 -> LUMO   | 96.1 %    |
| 353.09 nm  | 0.0050    | HOMO-2 -> LUMO   | 96.6 %    |
| 331.18 nm  | 0.0212    | HOMO -> LUMO+1   | 97.2 %    |
| 322.04 nm  | 0.0108    | HOMO-1 -> LUMO+1 | 96.4 %    |
| 308.51 nm  | 0.0434    | HOMO-3 -> LUMO   | 96.1 %    |
| 303.88 nm  | 0.0100    | HOMO -> LUMO+2   | 72.4 %    |
|            |           | HOMO -> LUMO+3   | 6.9 %     |
|            |           | HOMO -> LUMO+5   | 12.9 %    |
| 296.23 nm  | 0.0106    | HOMO-4 -> LUMO   | 2.4 %     |
|            |           | HOMO-1 -> LUMO+2 | 50.9 %    |
|            |           | HOMO-1 -> LUMO+3 | 4.5 %     |
|            |           | HOMO-1 -> LUMO+5 | 10.5 %    |
|            |           | HOMO -> LUMO+2   | 3.0 %     |
|            |           | HOMO -> LUMO+4   | 15.8 %    |
|            |           | HOMO -> LUMO+5   | 3.1 %     |
| 292.96 nm  | 0.0014    | HOMO-2 -> LUMO+1 | 92.3 %    |
|            |           | HOMO-2 -> LUMO+4 | 2.2 %     |



|           |        |                  |        |
|-----------|--------|------------------|--------|
| 290.74 nm | 0.0742 | HOMO-4 -> LUMO   | 89.7 % |
|           |        | HOMO-2 -> LUMO+1 | 2.1 %  |
|           |        | HOMO-1 -> LUMO+2 | 2.6 %  |
| 285.01 nm | 0.0269 | HOMO-2 -> LUMO+2 | 2.1 %  |
|           |        | HOMO-1 -> LUMO+2 | 11.4 % |
|           |        | HOMO-1 -> LUMO+4 | 8.6 %  |
|           |        | HOMO-1 -> LUMO+5 | 6.3 %  |
|           |        | HOMO -> LUMO+3   | 3.3 %  |
|           |        | HOMO -> LUMO+4   | 45.2 % |
|           |        | HOMO -> LUMO+5   | 10.1 % |
| 278.51 nm | 0.0126 | HOMO-1 -> LUMO+2 | 14.3 % |
|           |        | HOMO-1 -> LUMO+3 | 5.3 %  |
|           |        | HOMO-1 -> LUMO+4 | 55.4 % |
|           |        | HOMO-1 -> LUMO+5 | 11.5 % |
|           |        | HOMO -> LUMO+4   | 3.3 %  |
| 272.19 nm | 0.0029 | HOMO-5 -> LUMO   | 6.4 %  |
|           |        | HOMO -> LUMO+2   | 9.9 %  |
|           |        | HOMO -> LUMO+3   | 73.0 % |
|           |        | HOMO -> LUMO+4   | 5.6 %  |
| 270.80 nm | 0.1328 | HOMO-7 -> LUMO   | 3.9 %  |
|           |        | HOMO-5 -> LUMO   | 53.1 % |
|           |        | HOMO-3 -> LUMO+1 | 2.4 %  |
|           |        | HOMO-2 -> LUMO+2 | 15.8 % |
|           |        | HOMO-2 -> LUMO+4 | 4.5 %  |
|           |        | HOMO -> LUMO+3   | 7.0 %  |
|           |        | HOMO -> LUMO+4   | 2.4 %  |

|           |        |                  |        |
|-----------|--------|------------------|--------|
| 268.38 nm | 0.1069 | HOMO-5 -> LUMO   | 24.1 % |
|           |        | HOMO-2 -> LUMO+1 | 2.6 %  |
|           |        | HOMO-2 -> LUMO+2 | 40.2 % |
|           |        | HOMO-2 -> LUMO+4 | 19.5 % |
| 265.43 nm | 0.0361 | HOMO-3 -> LUMO+1 | 72.6 % |
|           |        | HOMO-2 -> LUMO+4 | 2.2 %  |
|           |        | HOMO-1 -> LUMO+3 | 15.7 % |
|           |        | HOMO-1 -> LUMO+4 | 3.4 %  |
| 264.89 nm | 0.0372 | HOMO-3 -> LUMO+1 | 20.3 % |
|           |        | HOMO-1 -> LUMO+2 | 4.5 %  |
|           |        | HOMO-1 -> LUMO+3 | 60.0 % |
|           |        | HOMO-1 -> LUMO+4 | 7.4 %  |
| 262.87 nm | 0.0048 | HOMO -> LUMO+2   | 8.6 %  |
|           |        | HOMO -> LUMO+3   | 7.0 %  |
|           |        | HOMO -> LUMO+4   | 12.2 % |
|           |        | HOMO -> LUMO+5   | 66.3 % |
| 260.39 nm | 0.0052 | HOMO-6 -> LUMO   | 91.9 % |
| 257.63 nm | 0.0176 | HOMO-7 -> LUMO   | 35.8 % |
|           |        | HOMO-6 -> LUMO   | 2.2 %  |
|           |        | HOMO-5 -> LUMO   | 5.3 %  |
|           |        | HOMO-4 -> LUMO+1 | 3.6 %  |
|           |        | HOMO-2 -> LUMO+4 | 9.7 %  |
|           |        | HOMO-2 -> LUMO+5 | 4.2 %  |
|           |        | HOMO-1 -> LUMO+3 | 2.9 %  |
|           |        | HOMO-1 -> LUMO+4 | 6.0 %  |
|           |        | HOMO-1 -> LUMO+5 | 16.4 % |

**Table S11.** Calculated transitions for **3CI**

| Wavelength | Intensity | Levels           | Character |
|------------|-----------|------------------|-----------|
| 440.48 nm  | 0.0021    | HOMO -> LUMO     | 97.8 %    |
| 410.61 nm  | 0.0984    | HOMO-1 -> LUMO   | 97.5 %    |
| 382.95 nm  | 0.0003    | HOMO-2 -> LUMO   | 97.3 %    |
| 328.79 nm  | 0.0131    | HOMO-3 -> LUMO   | 4.8 %     |
|            |           | HOMO -> LUMO+1   | 81.0 %    |
|            |           | HOMO -> LUMO+2   | 7.6 %     |
| 323.64 nm  | 0.0434    | HOMO-4 -> LUMO   | 6.6 %     |
|            |           | HOMO-3 -> LUMO   | 82.1 %    |
|            |           | HOMO-1 -> LUMO+1 | 5.3 %     |
|            |           | HOMO -> LUMO+1   | 2.7 %     |
| 314.94 nm  | 0.0277    | HOMO-5 -> LUMO   | 2.3 %     |
|            |           | HOMO-3 -> LUMO   | 4.2 %     |
|            |           | HOMO-1 -> LUMO+1 | 81.0 %    |
|            |           | HOMO-1 -> LUMO+2 | 5.4 %     |
| 313.08 nm  | 0.1007    | HOMO-5 -> LUMO   | 5.0 %     |
|            |           | HOMO-4 -> LUMO   | 83.9 %    |
|            |           | HOMO-3 -> LUMO   | 5.5 %     |
| 301.11 nm  | 0.0795    | HOMO-7 -> LUMO   | 3.5 %     |
|            |           | HOMO-5 -> LUMO   | 38.4 %    |
|            |           | HOMO-4 -> LUMO   | 5.2 %     |

|           |        |                  |        |
|-----------|--------|------------------|--------|
|           |        | HOMO-3 -> LUMO+1 | 2.5 %  |
|           |        | HOMO-2 -> LUMO+1 | 7.5 %  |
|           |        | HOMO-1 -> LUMO+2 | 2.3 %  |
|           |        | HOMO -> LUMO+1   | 5.4 %  |
|           |        | HOMO -> LUMO+2   | 24.1 % |
|           |        | HOMO -> LUMO+3   | 2.7 %  |
| 298.08 nm | 0.1358 | HOMO-5 -> LUMO   | 28.3 % |
|           |        | HOMO-3 -> LUMO+1 | 2.6 %  |
|           |        | HOMO-2 -> LUMO+1 | 33.3 % |
|           |        | HOMO-2 -> LUMO+2 | 8.7 %  |
|           |        | HOMO -> LUMO+1   | 2.3 %  |
|           |        | HOMO -> LUMO+2   | 6.7 %  |
|           |        | HOMO -> LUMO+4   | 4.2 %  |
|           |        | HOMO -> LUMO+5   | 2.2 %  |
| 297.15 nm | 0.0477 | HOMO-5 -> LUMO   | 0.1 %  |
|           |        | HOMO-2 -> LUMO+1 | 36.4 % |
|           |        | HOMO-2 -> LUMO+2 | 5.6 %  |
|           |        | HOMO -> LUMO+1   | 3.9 %  |
|           |        | HOMO -> LUMO+2   | 27.1 % |
|           |        | HOMO -> LUMO+3   | 3.9 %  |
|           |        | HOMO -> LUMO+4   | 7.7 %  |
|           |        | HOMO -> LUMO+5   | 3.0 %  |
| 289.66 nm | 0.0516 | HOMO-5 -> LUMO   | 4.8 %  |
|           |        | HOMO-1 -> LUMO+1 | 7.0 %  |
|           |        | HOMO-1 -> LUMO+2 | 18.4 % |
|           |        | HOMO-1 -> LUMO+3 | 3.1 %  |
|           |        | HOMO-1 -> LUMO+4 | 12.1 % |
|           |        | HOMO-1 -> LUMO+5 | 6.1 %  |

|           |        |                  |        |
|-----------|--------|------------------|--------|
|           |        | HOMO -> LUMO+2   | 7.6 %  |
|           |        | HOMO -> LUMO+4   | 19.8 % |
|           |        | HOMO -> LUMO+5   | 13.0 % |
|           |        | HOMO -> LUMO+6   | 2.5 %  |
| 282.62 nm | 0.0247 | HOMO-1 -> LUMO+2 | 25.8 % |
|           |        | HOMO-1 -> LUMO+3 | 2.5 %  |
|           |        | HOMO-1 -> LUMO+4 | 8.7 %  |
|           |        | HOMO-1 -> LUMO+5 | 3.2 %  |
|           |        | HOMO -> LUMO+2   | 10.2 % |
|           |        | HOMO -> LUMO+4   | 24.8 % |
|           |        | HOMO -> LUMO+5   | 10.6 % |
| 281.97 nm | 0.0078 | HOMO-8 -> LUMO   | 78.7 % |
|           |        | HOMO-6 -> LUMO   | 14.3 % |
| 278.23 nm | 0.0298 | HOMO-7 -> LUMO   | 9.8 %  |
|           |        | HOMO-5 -> LUMO   | 3.9 %  |
|           |        | HOMO-1 -> LUMO+2 | 24.3 % |
|           |        | HOMO-1 -> LUMO+4 | 31.3 % |
|           |        | HOMO-1 -> LUMO+5 | 19.8 % |
|           |        | HOMO-1 -> LUMO+6 | 5.6 %  |
| 277.18 nm | 0.0031 | HOMO-8 -> LUMO   | 12.0 % |
|           |        | HOMO-7 -> LUMO   | 4.9 %  |
|           |        | HOMO-6 -> LUMO   | 79.3 % |
| 274.89 nm | 0.0446 | HOMO-8 -> LUMO   | 3.0 %  |
|           |        | HOMO-7 -> LUMO   | 55.7 % |
|           |        | HOMO-6 -> LUMO   | 3.4 %  |
|           |        | HOMO-5 -> LUMO   | 6.8 %  |

|           |        |                  |        |
|-----------|--------|------------------|--------|
|           |        | HOMO-3 -> LUMO+1 | 9.4 %  |
|           |        | HOMO-1 -> LUMO+2 | 6.4 %  |
|           |        | HOMO-1 -> LUMO+4 | 3.4 %  |
|           |        | HOMO-1 -> LUMO+5 | 2.4 %  |
| 271.52 nm | 0.0166 | HOMO -> LUMO+2   | 7.8 %  |
|           |        | HOMO -> LUMO+3   | 83.9 % |
|           |        | HOMO -> LUMO+4   | 2.6 %  |
| 269.30 nm | 0.0144 | HOMO-2 -> LUMO+1 | 18.5 % |
|           |        | HOMO-2 -> LUMO+2 | 64.7 % |
|           |        | HOMO-2 -> LUMO+3 | 6.2 %  |
| 262.55 nm | 0.0110 | HOMO-1 -> LUMO+2 | 5.8 %  |
|           |        | HOMO-1 -> LUMO+3 | 84.2 % |
| 260.78 nm | 0.0076 | HOMO-9 -> LUMO   | 11.0 % |
|           |        | HOMO-3 -> LUMO+1 | 6.9 %  |
|           |        | HOMO-2 -> LUMO+4 | 6.6 %  |
|           |        | HOMO-2 -> LUMO+5 | 3.7 %  |
|           |        | HOMO-1 -> LUMO+3 | 2.4 %  |
|           |        | HOMO -> LUMO+4   | 24.2 % |
|           |        | HOMO -> LUMO+5   | 37.1 % |
|           |        | HOMO -> LUMO+5   | 37.1 % |

**Table S12.** Calculated transitions for **3Br**

| Wavelength | Intensity | Levels           | Character |
|------------|-----------|------------------|-----------|
| 445.85 nm  | 0.0012    | HOMO -> LUMO     | 98.0 %    |
| 420.40 nm  | 0.0758    | HOMO-1 -> LUMO   | 97.8 %    |
| 382.29 nm  | 0.0002    | HOMO-2 -> LUMO   | 97.3 %    |
| 340.23 nm  | 0.0258    | HOMO-4 -> LUMO   | 4.5 %     |
|            |           | HOMO-3 -> LUMO   | 93.4 %    |
| 332.70 nm  | 0.0065    | HOMO-4 -> LUMO   | 7.7 %     |
|            |           | HOMO -> LUMO+1   | 78.8 %    |
|            |           | HOMO -> LUMO+2   | 7.6 %     |
| 324.35 nm  | 0.0950    | HOMO-4 -> LUMO   | 79.7 %    |
|            |           | HOMO-3 -> LUMO   | 3.3 %     |
|            |           | HOMO-1 -> LUMO+1 | 5.6 %     |
|            |           | HOMO -> LUMO+1   | 6.3 %     |
| 320.36 nm  | 0.0281    | HOMO-5 -> LUMO   | 2.6 %     |
|            |           | HOMO-4 -> LUMO   | 3.3 %     |
|            |           | HOMO-1 -> LUMO+1 | 82.9 %    |
|            |           | HOMO-1 -> LUMO+2 | 4.9 %     |
| 303.78 nm  | 0.0916    | HOMO-8 -> LUMO   | 2.8 %     |
|            |           | HOMO-6 -> LUMO   | 3.6 %     |
|            |           | HOMO-5 -> LUMO   | 48.2 %    |
|            |           | HOMO-4 -> LUMO+1 | 2.4 %     |

|           |        |                  |        |
|-----------|--------|------------------|--------|
|           |        | HOMO-1 -> LUMO+2 | 2.4 %  |
|           |        | HOMO -> LUMO+1   | 4.0 %  |
|           |        | HOMO -> LUMO+2   | 24.6 % |
|           |        | HOMO -> LUMO+3   | 2.3 %  |
| 301.32 nm | 0.0648 | HOMO-6 -> LUMO   | 22.0 % |
|           |        | HOMO-5 -> LUMO   | 17.0 % |
|           |        | HOMO-2 -> LUMO+1 | 2.7 %  |
|           |        | HOMO -> LUMO+1   | 6.1 %  |
|           |        | HOMO -> LUMO+2   | 31.1 % |
|           |        | HOMO -> LUMO+3   | 4.3 %  |
|           |        | HOMO -> LUMO+4   | 4.8 %  |
|           |        | HOMO -> LUMO+5   | 2.5 %  |
| 298.90 nm | 0.1038 | HOMO-8 -> LUMO   | 2.0 %  |
|           |        | HOMO-6 -> LUMO   | 49.9 % |
|           |        | HOMO-5 -> LUMO   | 7.7 %  |
|           |        | HOMO-2 -> LUMO+1 | 9.9 %  |
|           |        | HOMO-1 -> LUMO+2 | 4.4 %  |
|           |        | HOMO -> LUMO+2   | 6.1 %  |
|           |        | HOMO -> LUMO+3   | 2.1 %  |
|           |        | HOMO -> LUMO+4   | 3.8 %  |
|           |        | HOMO -> LUMO+5   | 2.1 %  |
| 297.86 nm | 0.0163 | HOMO-6 -> LUMO   | 12.5 % |
|           |        | HOMO-2 -> LUMO+1 | 62.5 % |
|           |        | HOMO-2 -> LUMO+2 | 14.1 % |
| 292.75 nm | 0.0471 | HOMO-6 -> LUMO   | 3.0 %  |
|           |        | HOMO-5 -> LUMO   | 4.5 %  |
|           |        | HOMO-1 -> LUMO+1 | 6.4 %  |



|           |        |                  |        |
|-----------|--------|------------------|--------|
|           |        | HOMO-1 -> LUMO+2 | 24.9 % |
|           |        | HOMO-1 -> LUMO+3 | 5.3 %  |
|           |        | HOMO-1 -> LUMO+4 | 10.8 % |
|           |        | HOMO-1 -> LUMO+5 | 6.1 %  |
|           |        | HOMO -> LUMO+2   | 6.3 %  |
|           |        | HOMO -> LUMO+4   | 13.6 % |
|           |        | HOMO -> LUMO+5   | 10.0 % |
| 285.79 nm | 0.0245 | HOMO-1 -> LUMO+2 | 29.7 % |
|           |        | HOMO-1 -> LUMO+3 | 2.1 %  |
|           |        | HOMO-1 -> LUMO+4 | 2.2 %  |
|           |        | HOMO -> LUMO+2   | 10.1 % |
|           |        | HOMO -> LUMO+3   | 6.7 %  |
|           |        | HOMO -> LUMO+4   | 25.1 % |
|           |        | HOMO -> LUMO+5   | 12.7 % |
| 281.71 nm | 0.0147 | HOMO-1 -> LUMO+2 | 22.6 % |
|           |        | HOMO-1 -> LUMO+3 | 4.9 %  |
|           |        | HOMO-1 -> LUMO+4 | 34.6 % |
|           |        | HOMO-1 -> LUMO+5 | 23.4 % |
|           |        | HOMO-1 -> LUMO+6 | 5.5 %  |
| 278.84 nm | 0.0134 | HOMO-9 -> LUMO   | 5.3 %  |
|           |        | HOMO-8 -> LUMO   | 23.4 % |
|           |        | HOMO-7 -> LUMO   | 59.1 % |
|           |        | HOMO-6 -> LUMO   | 4.1 %  |
| 276.03 nm | 0.0441 | HOMO-8 -> LUMO   | 47.4 % |
|           |        | HOMO-7 -> LUMO   | 32.8 % |
|           |        | HOMO-5 -> LUMO   | 7.2 %  |
|           |        | HOMO-4 -> LUMO+1 | 2.6 %  |

|           |        |                  |        |
|-----------|--------|------------------|--------|
|           |        | HOMO-3 -> LUMO+1 | 4.3 %  |
| 272.94 nm | 0.0066 | HOMO -> LUMO+2   | 3.4 %  |
|           |        | HOMO -> LUMO+3   | 77.8 % |
|           |        | HOMO -> LUMO+4   | 12.5 % |
| 270.26 nm | 0.0412 | HOMO-9 -> LUMO   | 2.1 %  |
|           |        | HOMO-8 -> LUMO   | 3.4 %  |
|           |        | HOMO-3 -> LUMO+1 | 6.3 %  |
|           |        | HOMO-2 -> LUMO+1 | 18.0 % |
|           |        | HOMO-2 -> LUMO+2 | 59.1 % |
|           |        | HOMO-2 -> LUMO+3 | 3.7 %  |
| 269.25 nm | 0.0511 | HOMO-9 -> LUMO   | 76.7 % |
|           |        | HOMO-7 -> LUMO   | 2.2 %  |
|           |        | HOMO-4 -> LUMO+1 | 7.7 %  |
|           |        | HOMO-3 -> LUMO+1 | 3.2 %  |
| 267.70 nm | 0.0471 | HOMO-8 -> LUMO   | 5.4 %  |
|           |        | HOMO-4 -> LUMO+1 | 4.2 %  |
|           |        | HOMO-3 -> LUMO+1 | 73.9 % |
|           |        | HOMO-2 -> LUMO+2 | 7.9 %  |
|           |        | HOMO-2 -> LUMO+2 | 7.9 %  |

### <sup>1</sup>H-NMR Progressions for the Photochemical Studies

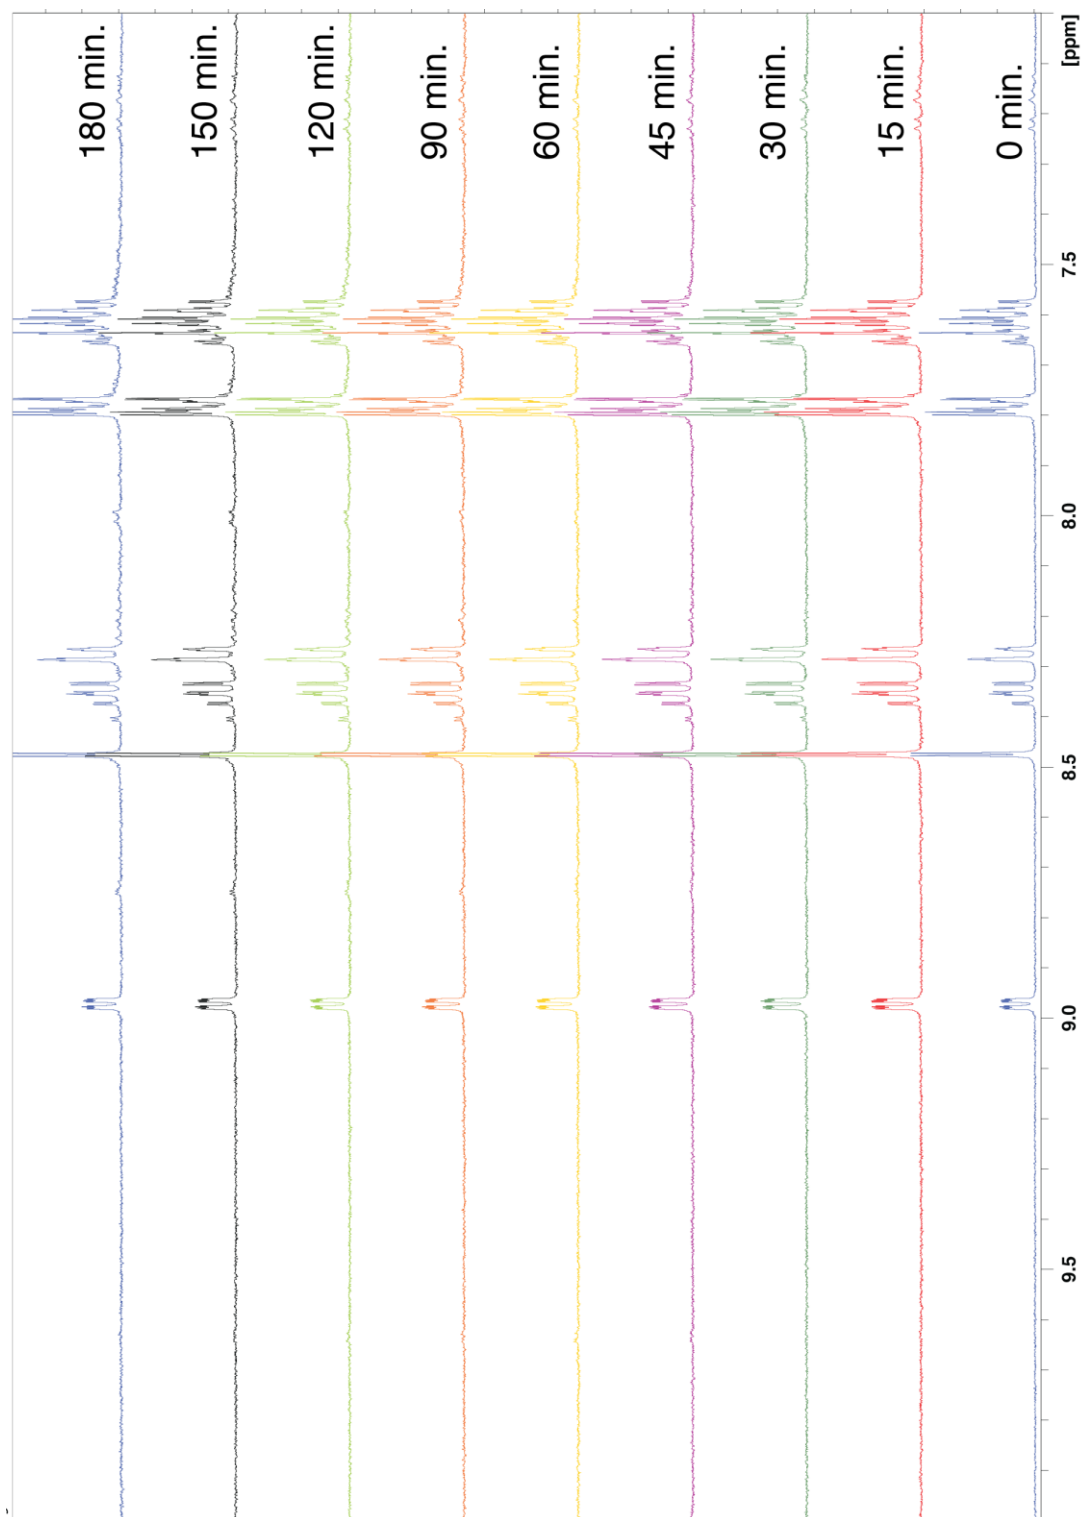

**Figure S14.** Photolysis of 2CI in a deuterated acetone solution.

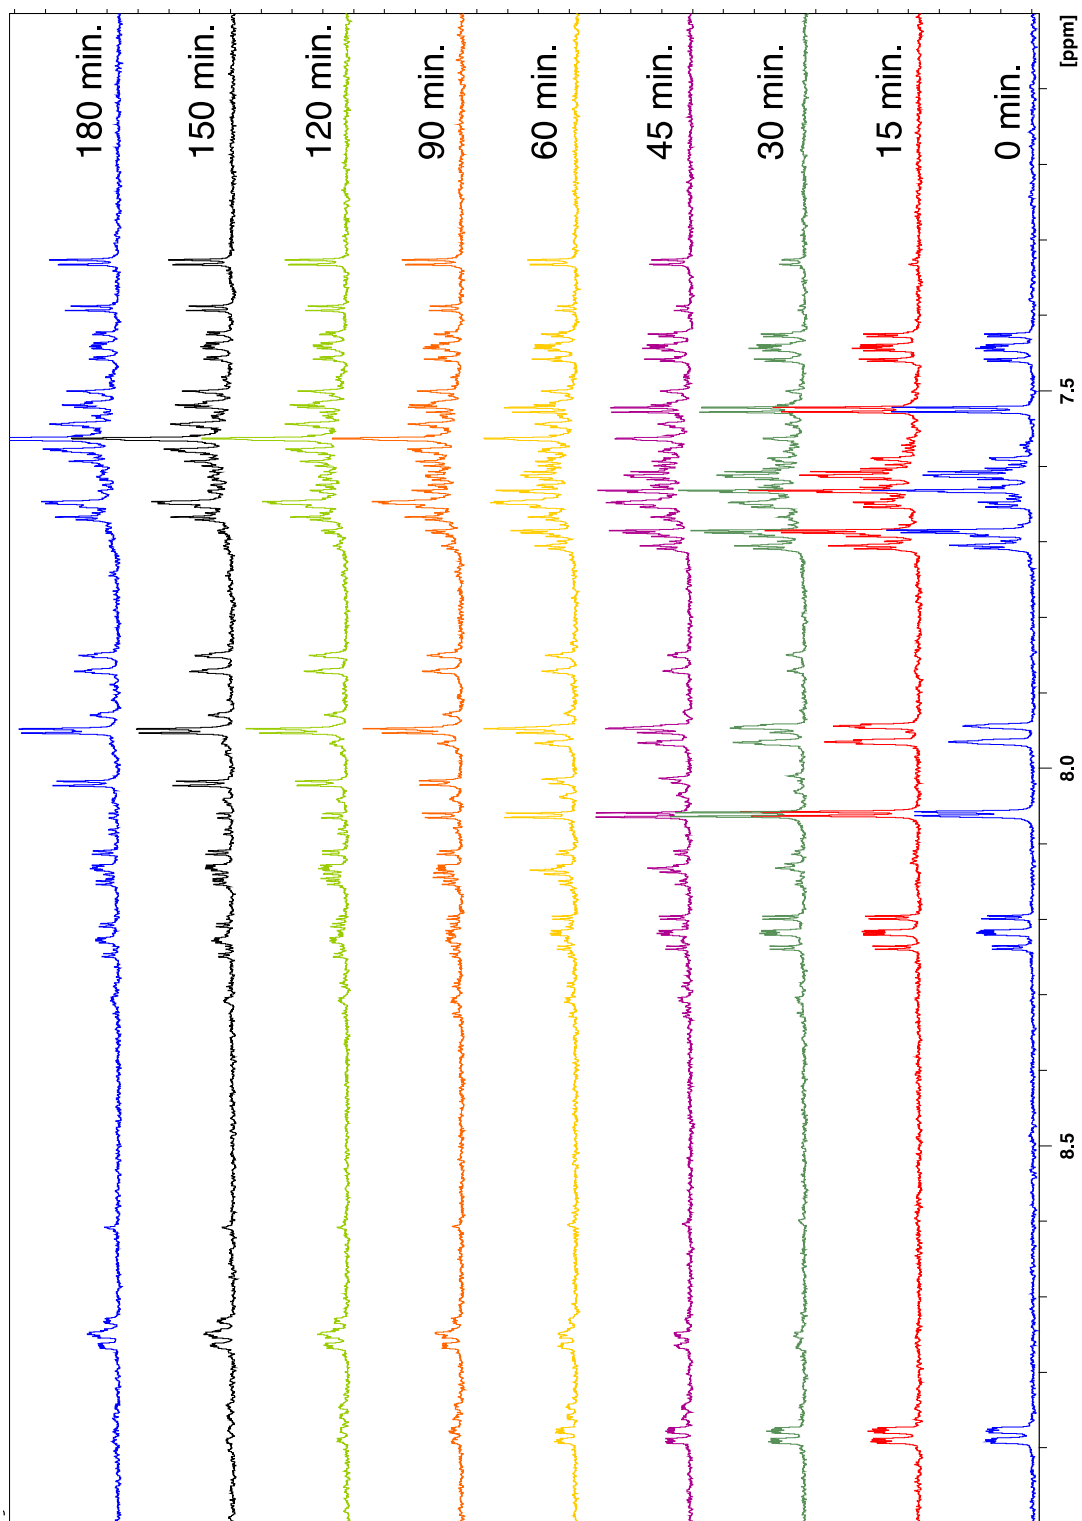

**Figure S15.** Photolysis of 2Cl in a deuterated acetonitrile solution.

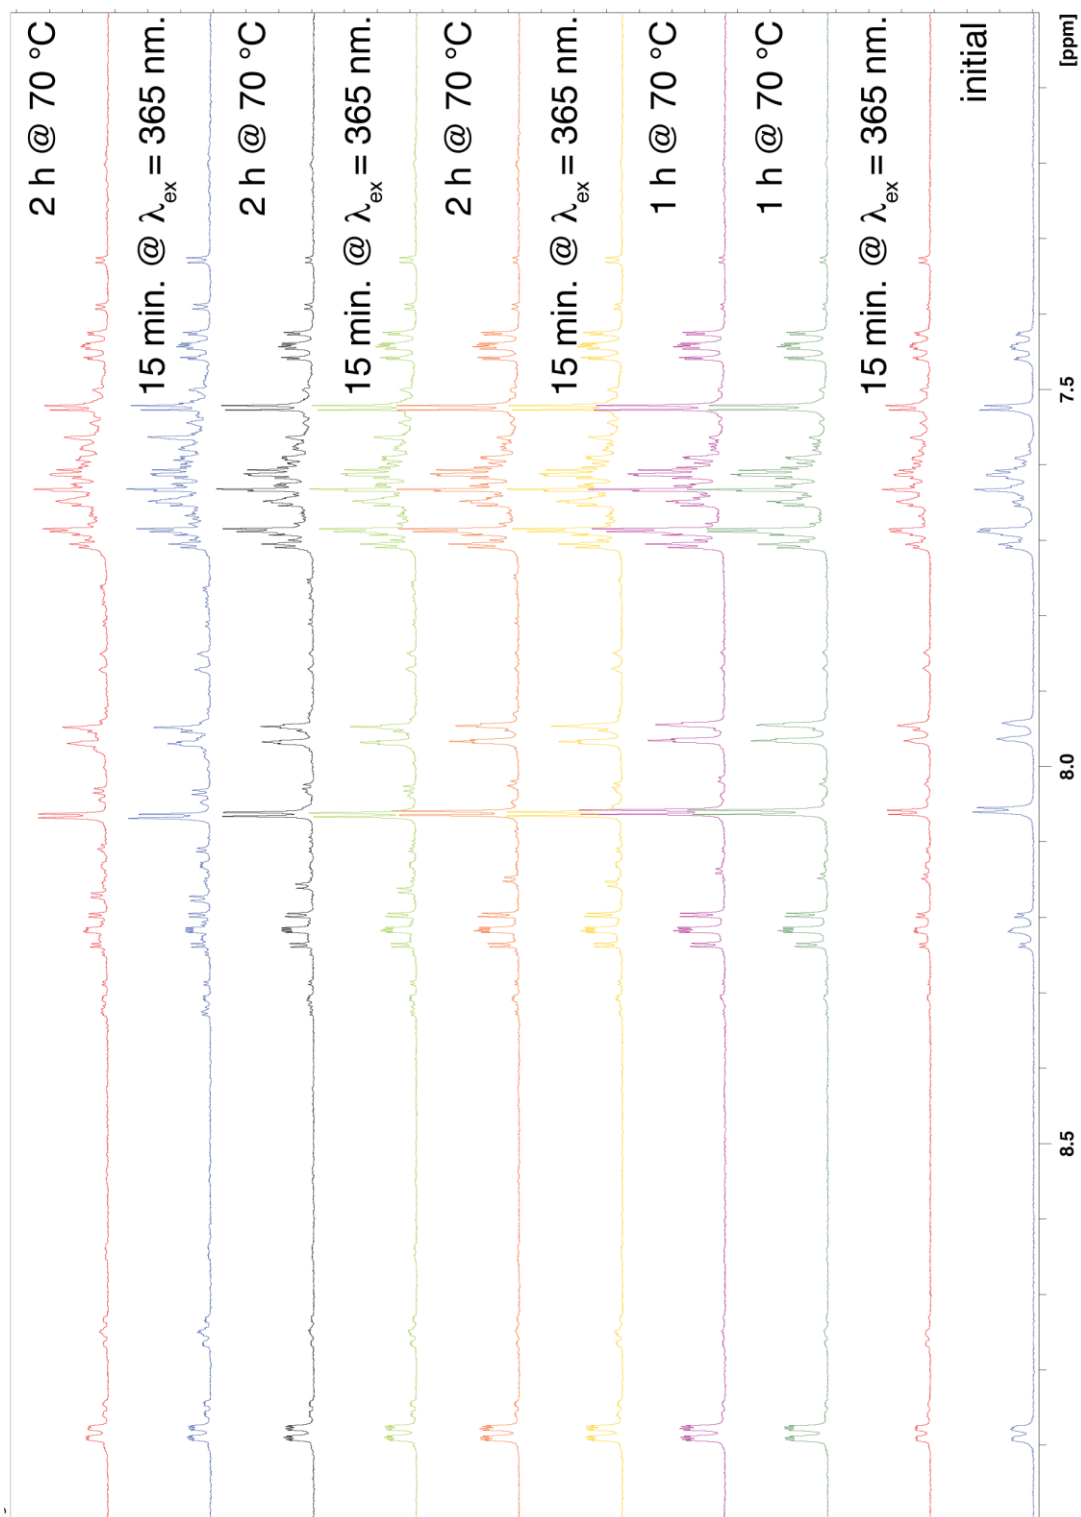

**Figure S16.** Photochemical and thermal steps of **2Cl** in a deuterated acetonitrile solution. The thermal steps were performed in darkness.

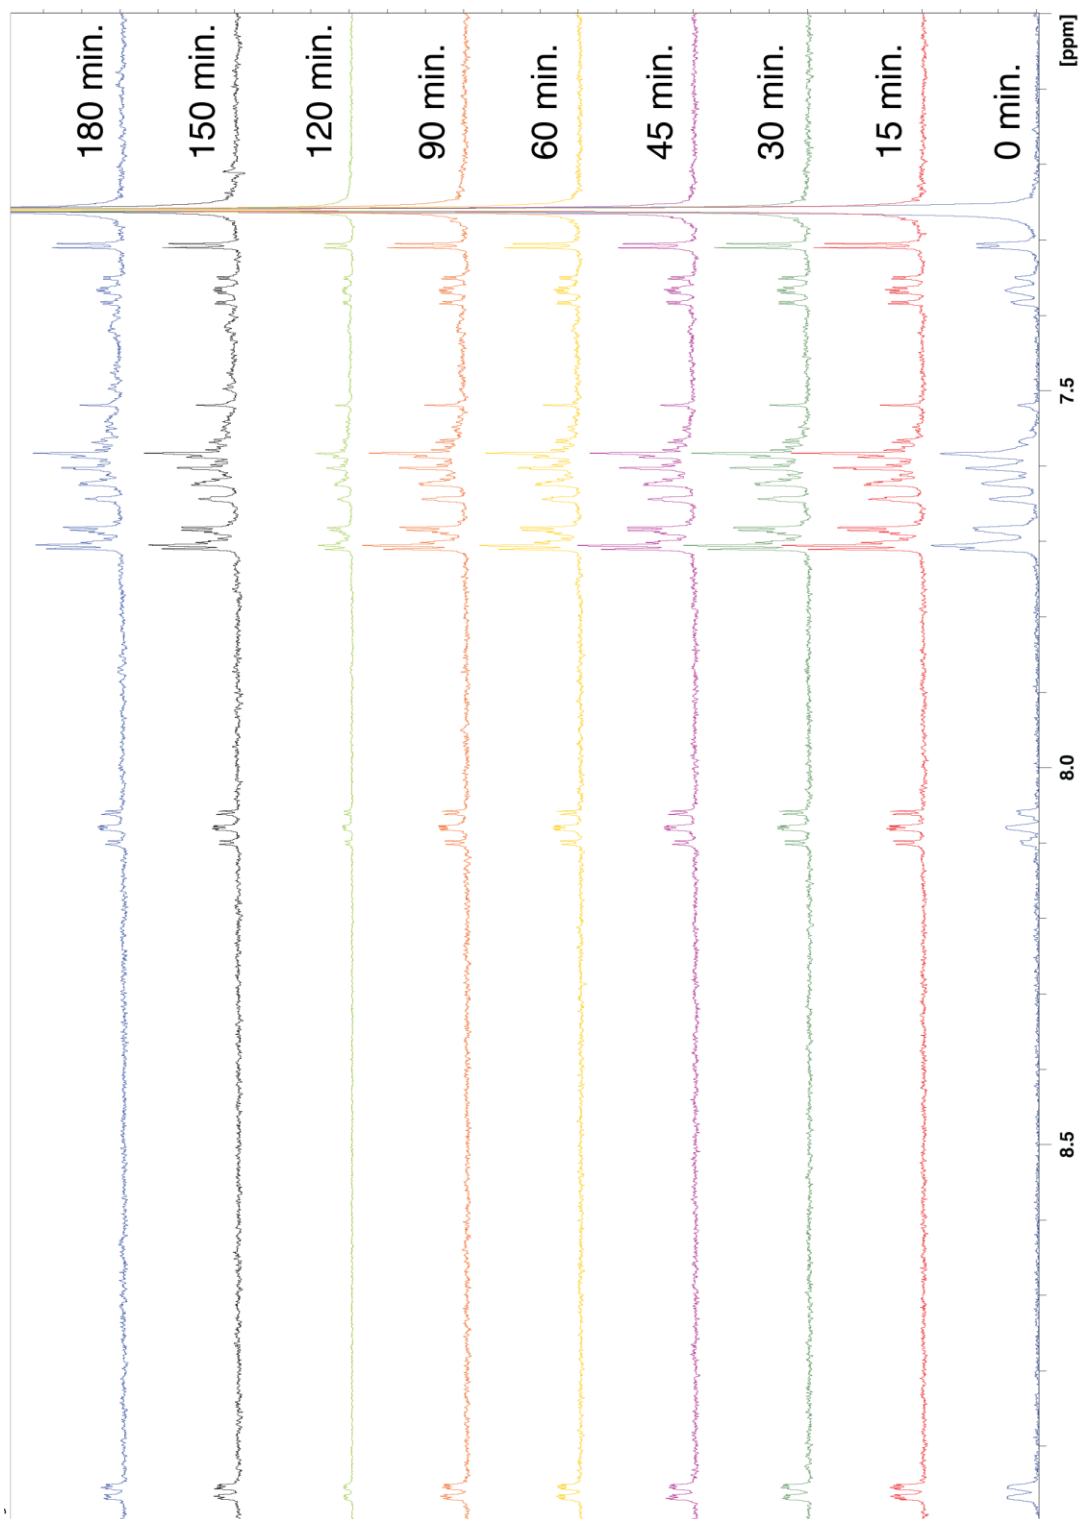

**Figure S17.** Photolysis of 2Cl in a deuterated chloroform solution.

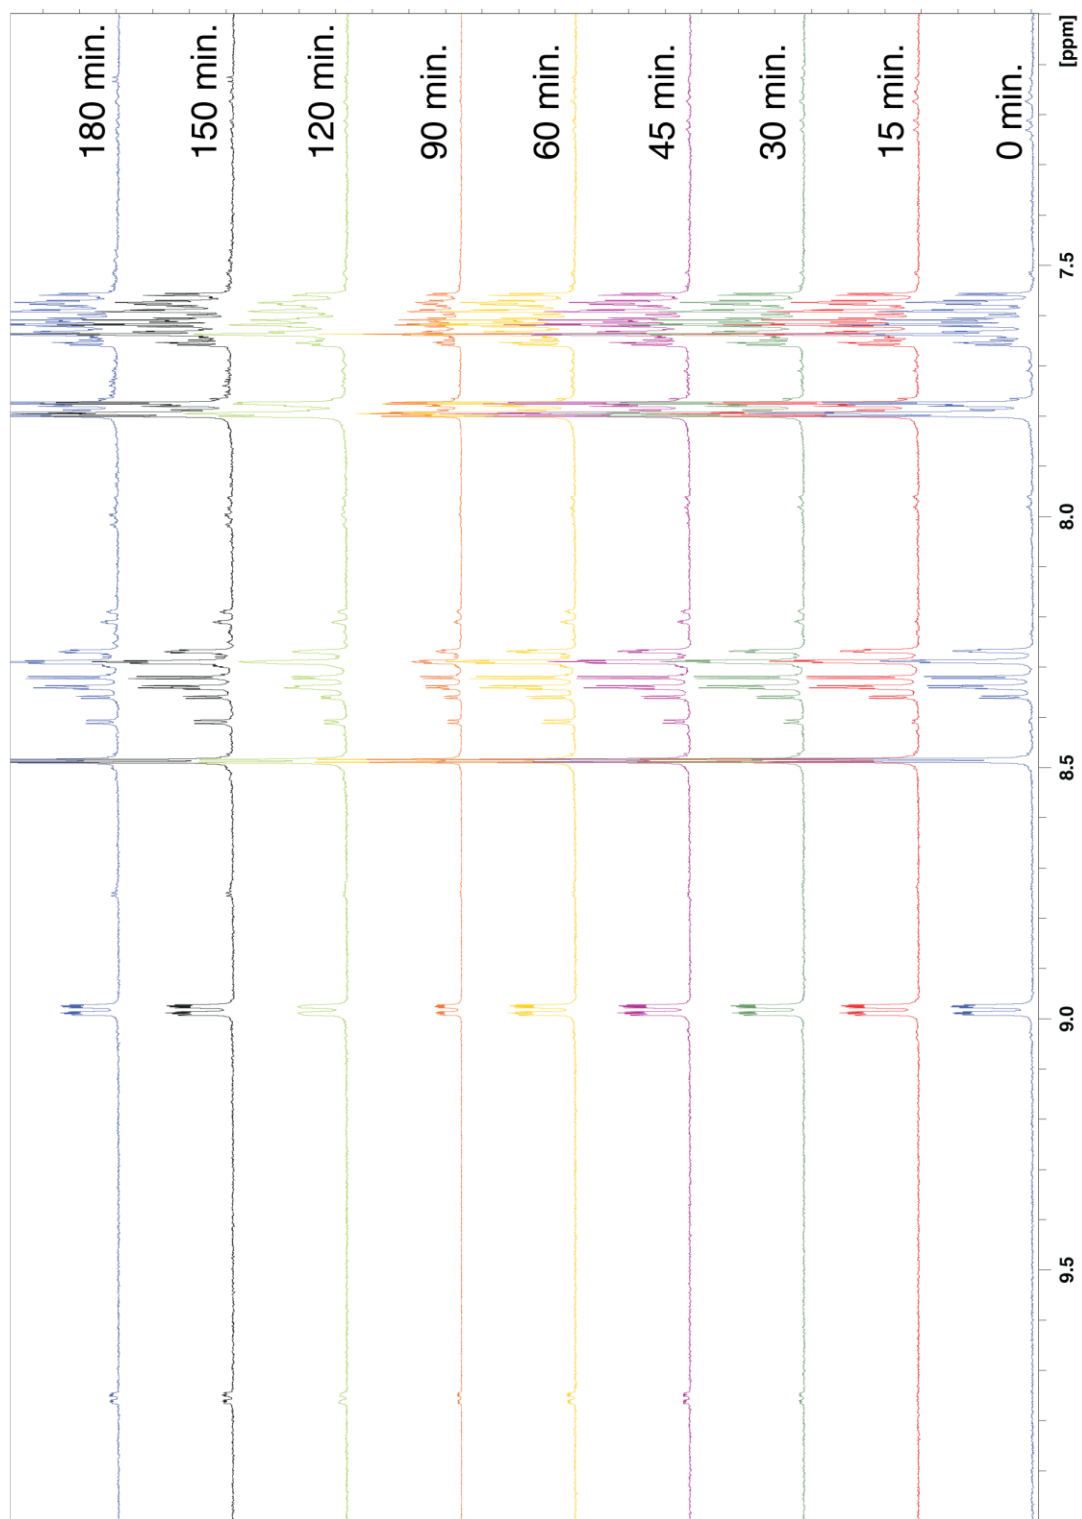

**Figure S18.** Photolysis of **2Br** in a deuterated acetone solution.

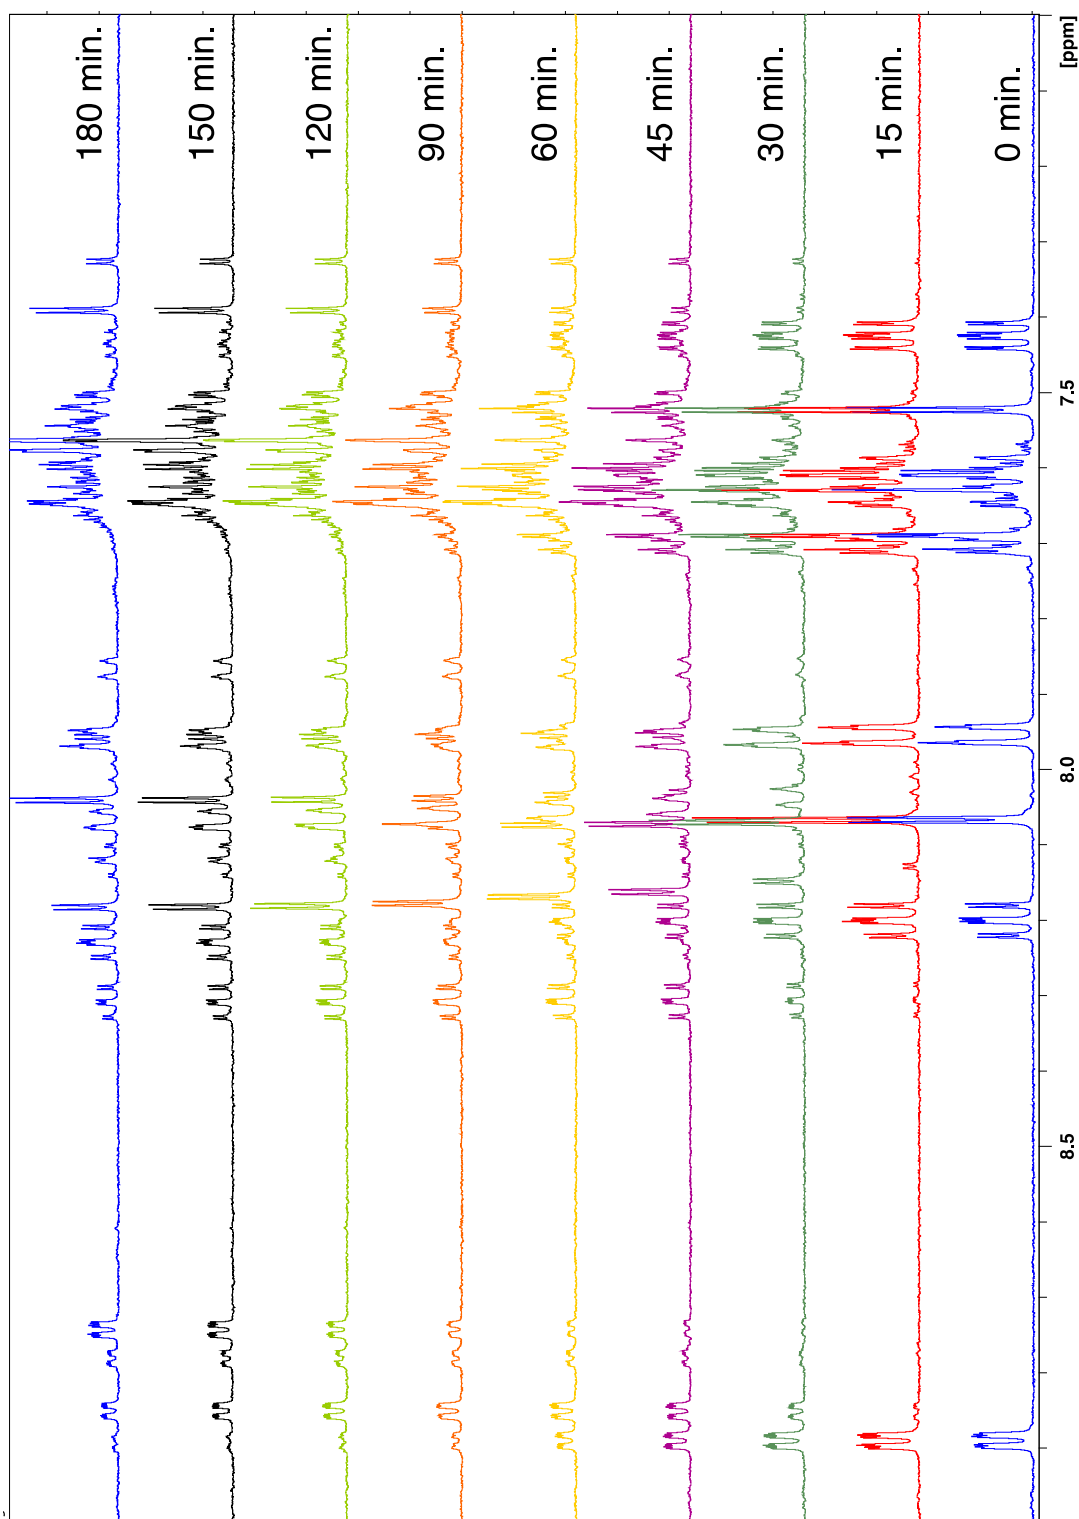

**Figure S19.** Photolysis of **2Br** in a deuterated acetonitrile solution.



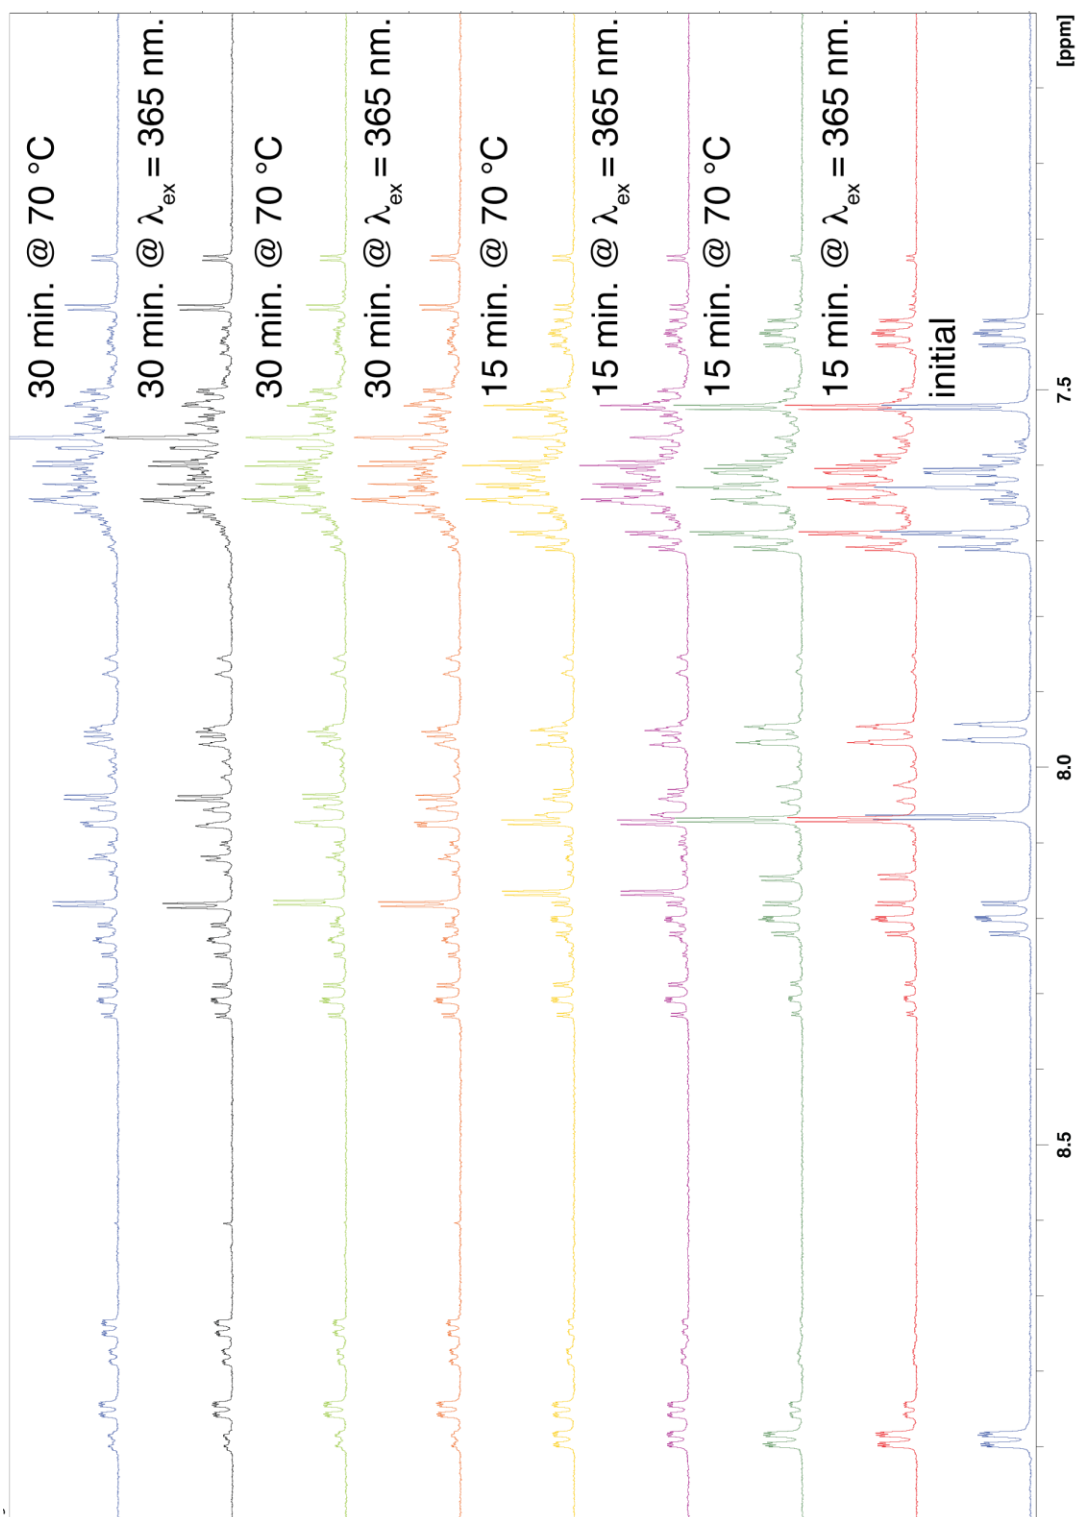

**Figure S20.** Photochemical and thermal steps of **2Br** in a deuterated acetonitrile solution. The thermal steps were performed in darkness.

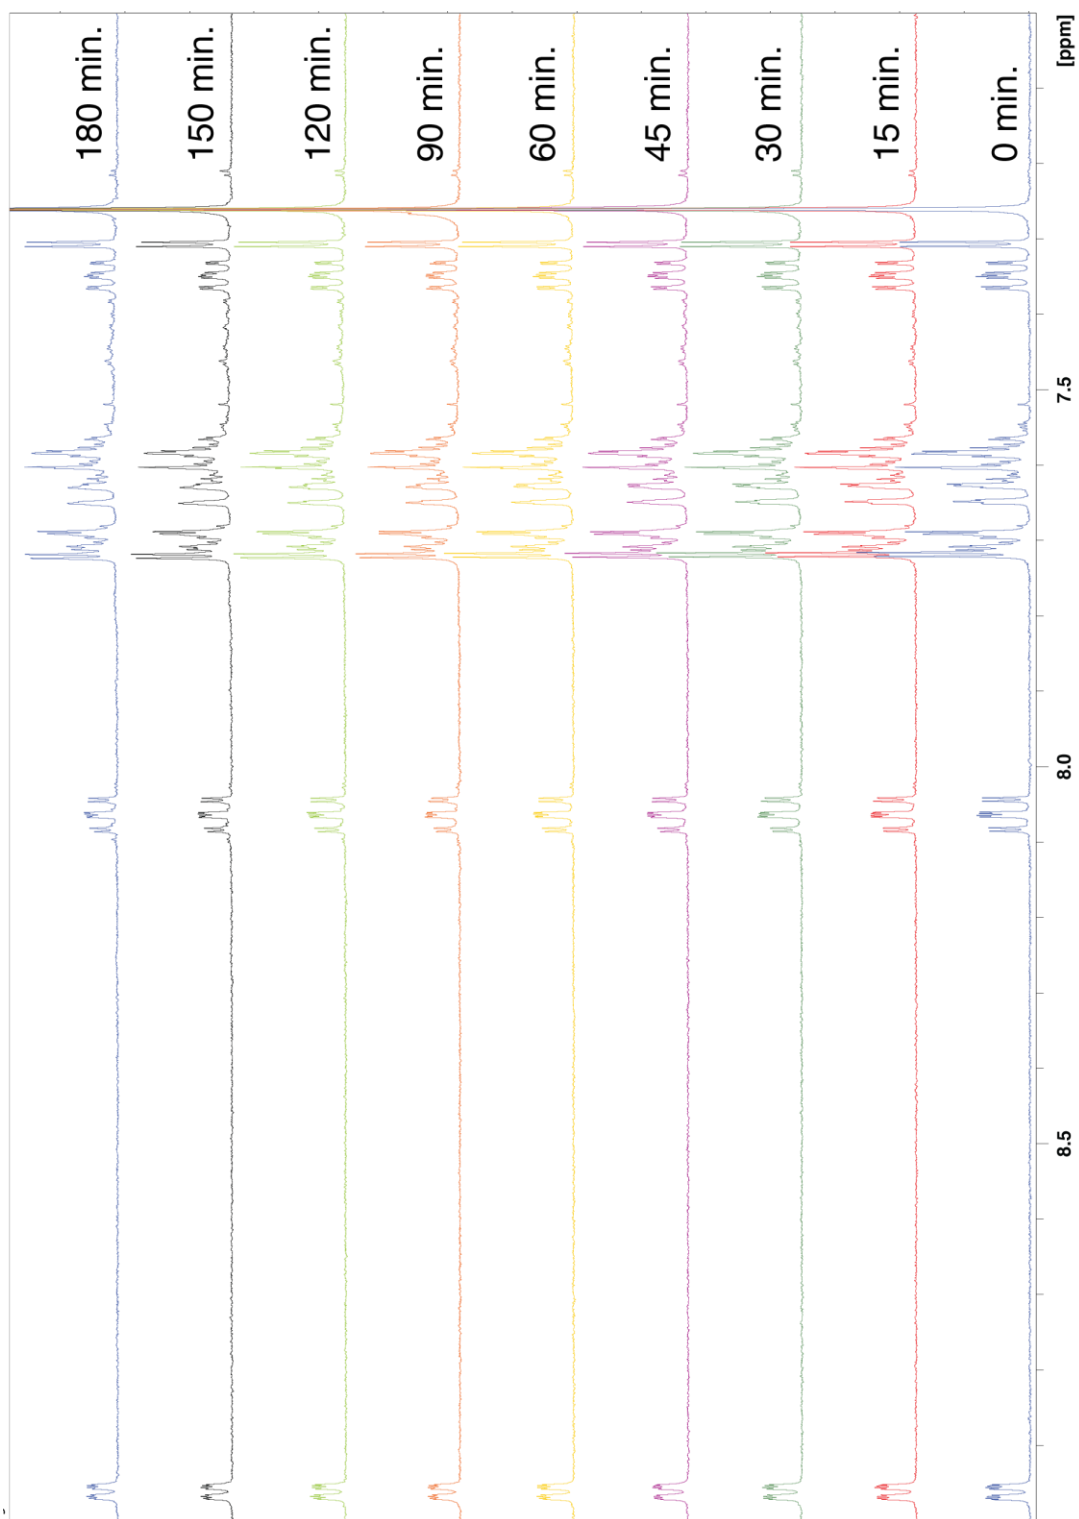

**Figure S21.** Photolysis of **2Br** in a deuterated chloroform solution.

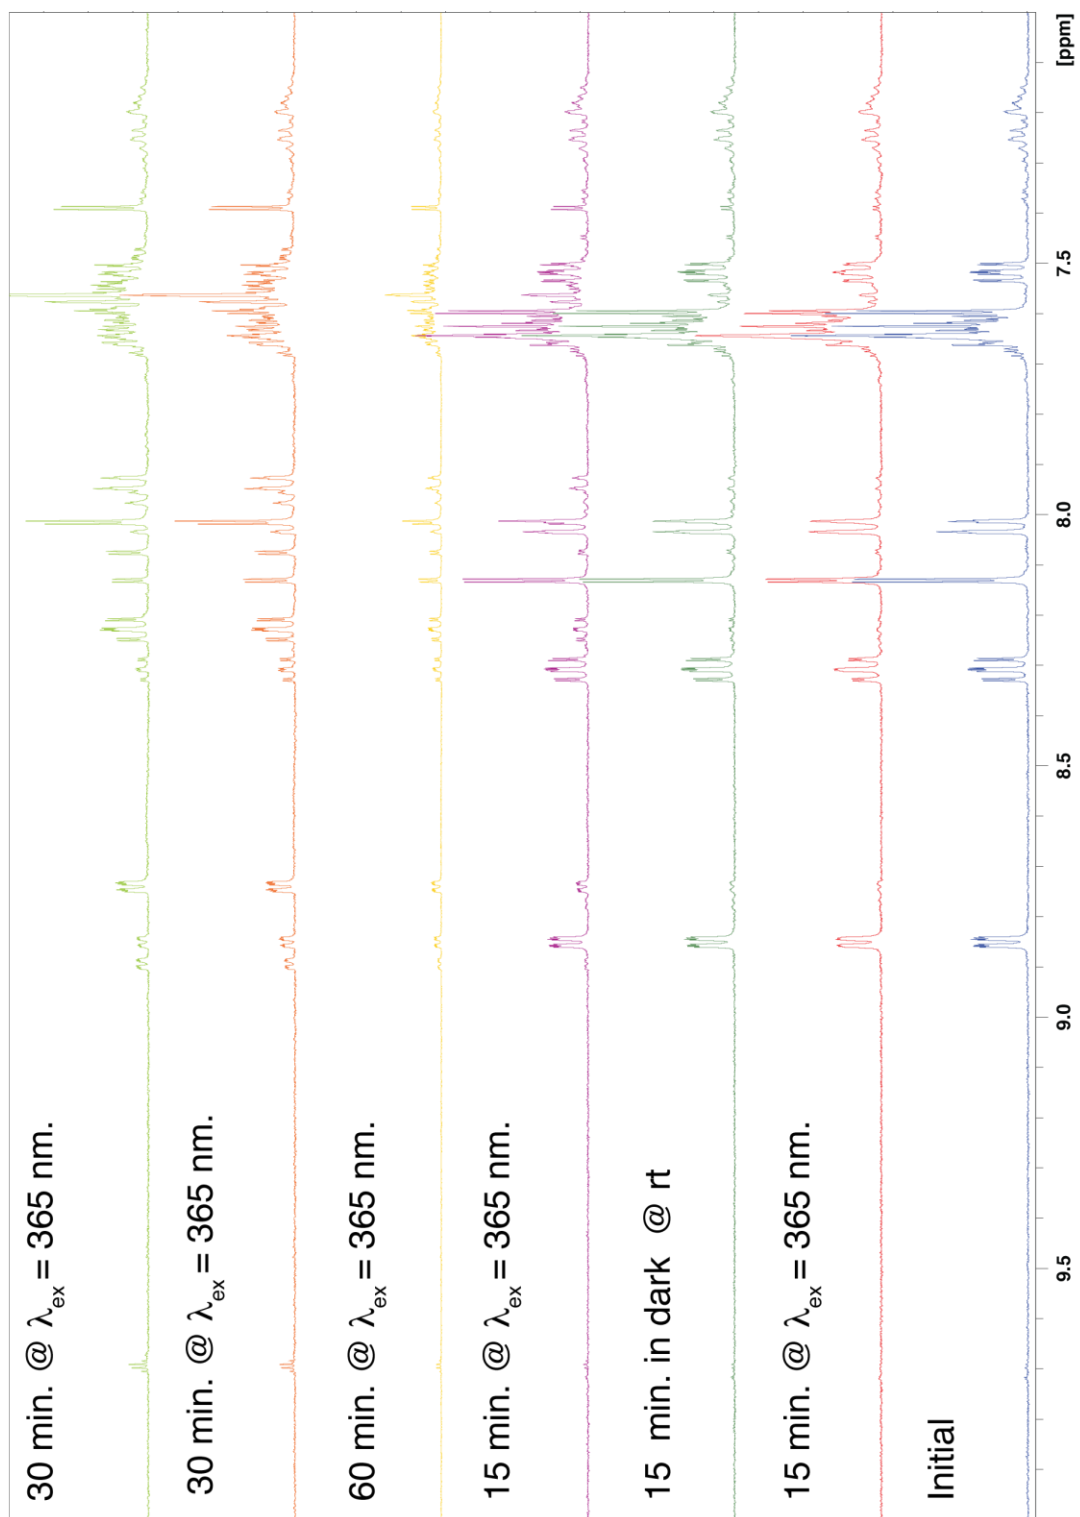

**Figure S22.** Photolysis of *fac*-[Re(CO)<sub>3</sub>(PyImPh)(NCCD<sub>3</sub>)]BF<sub>4</sub> in a deuterated acetonitrile solution.

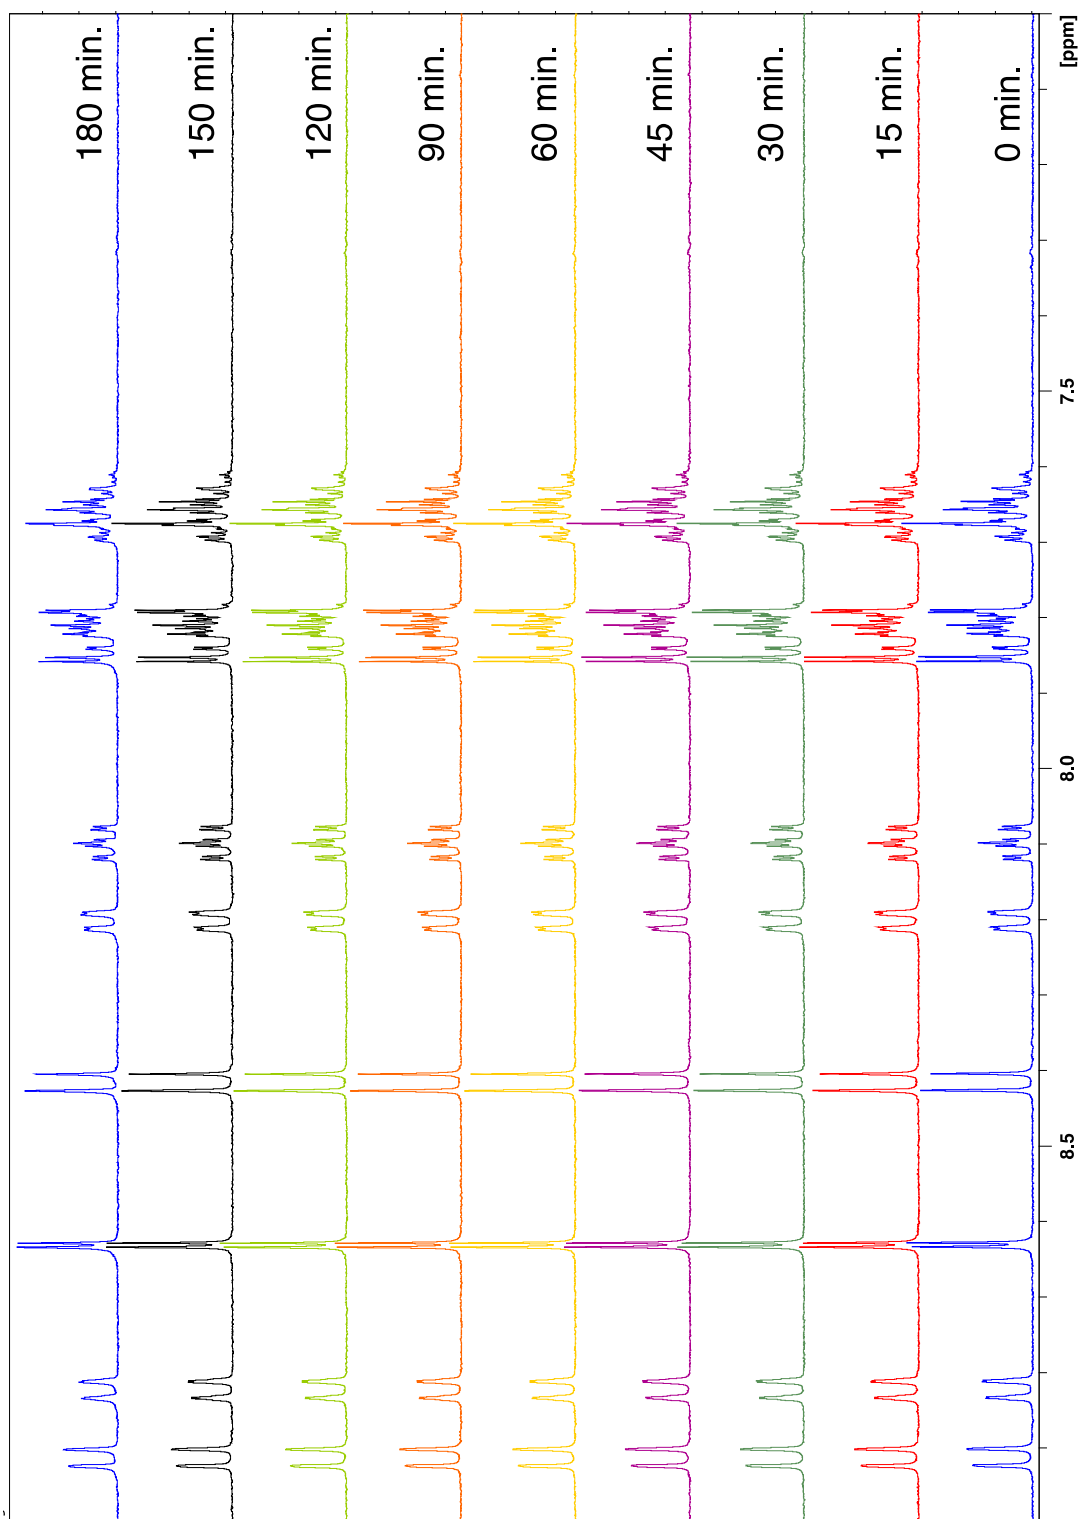

**Figure S23.** Photolysis of **3CI** in a deuterated acetone solution.

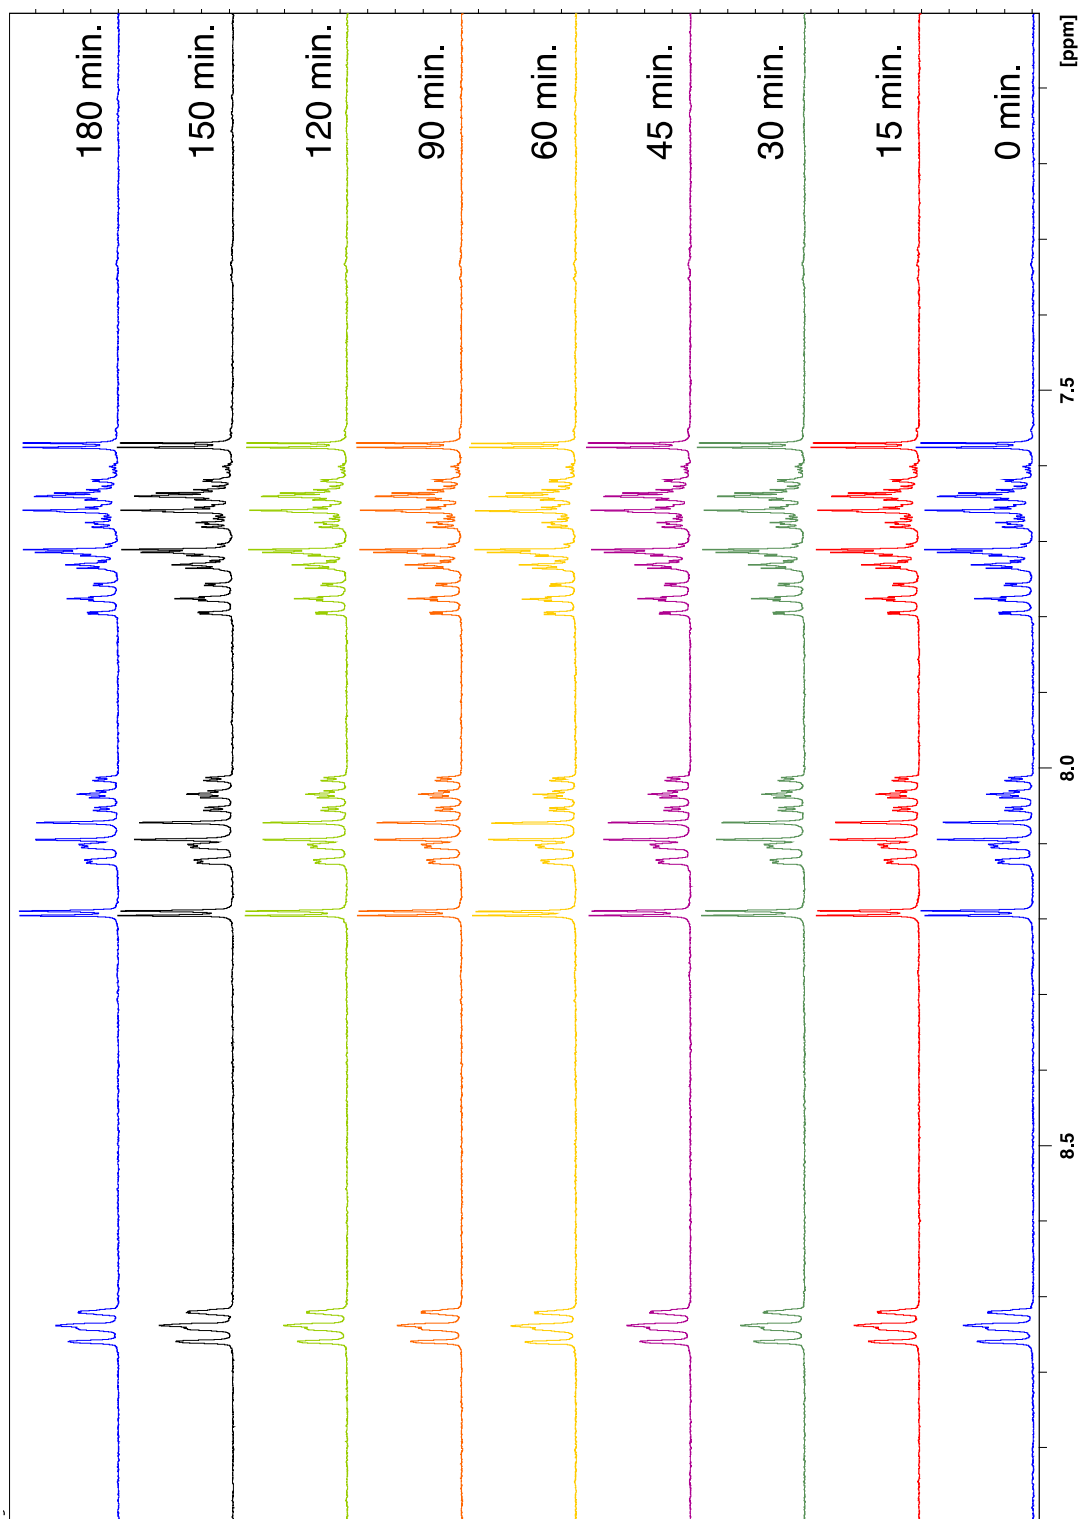

**Figure S24.** Photolysis of 3CI in a deuterated acetonitrile solution.

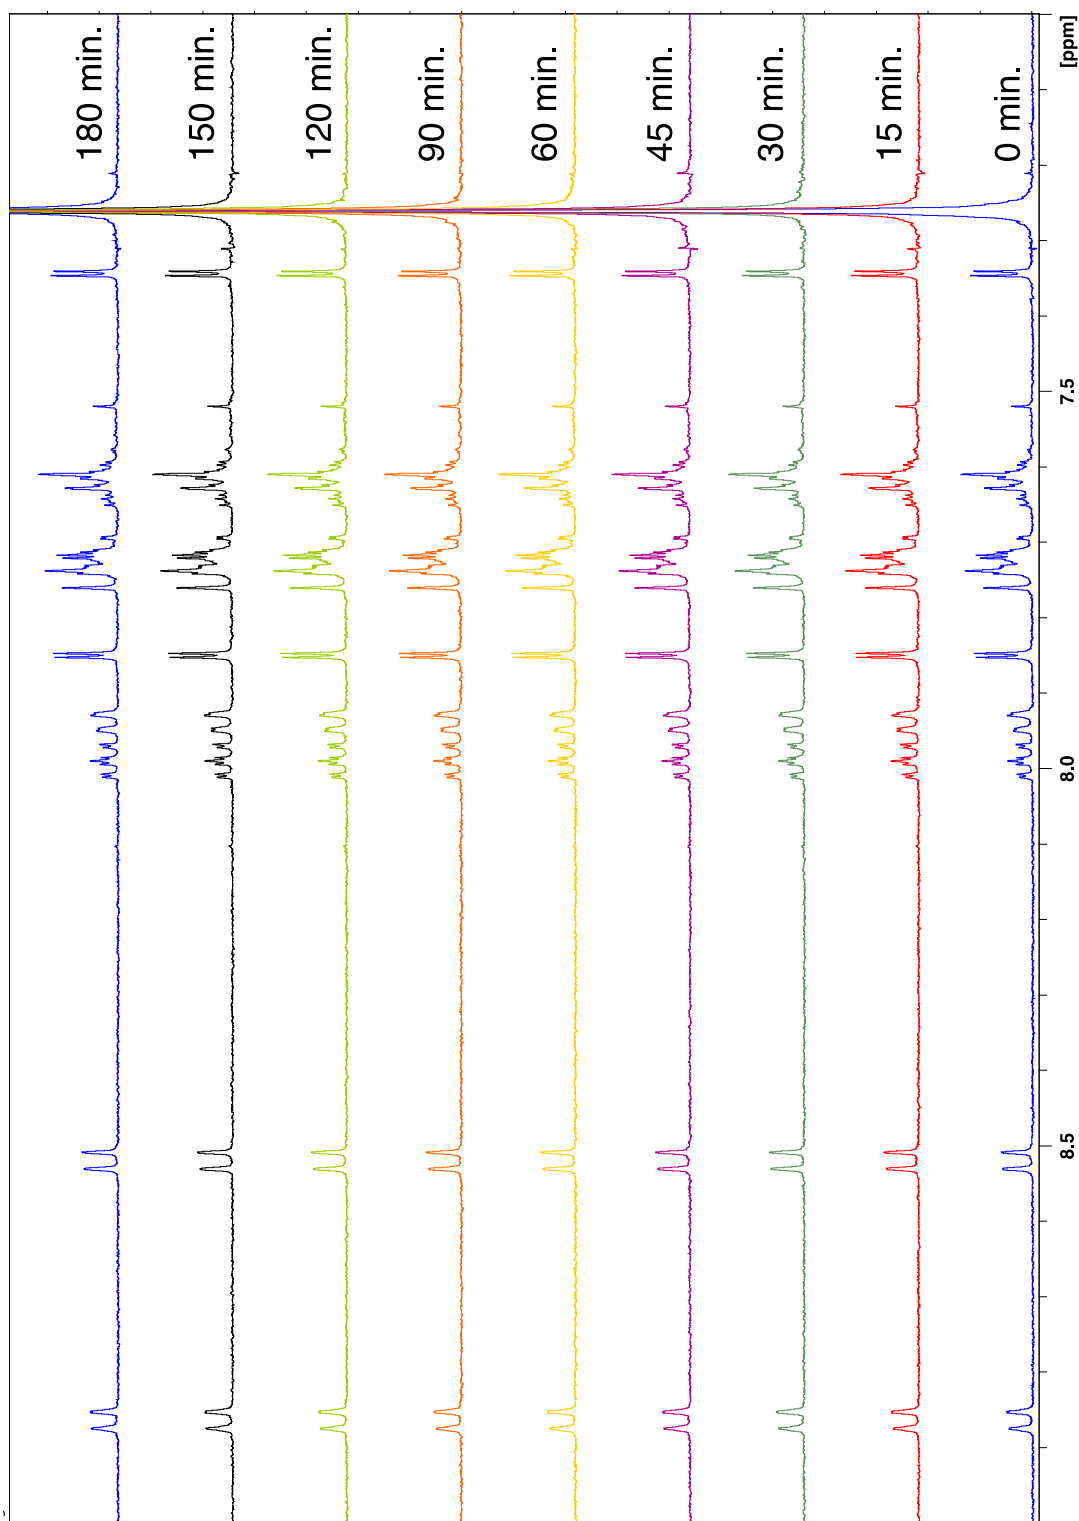

**Figure S25.** Photolysis of 3CI in a deuterated chloroform solution.

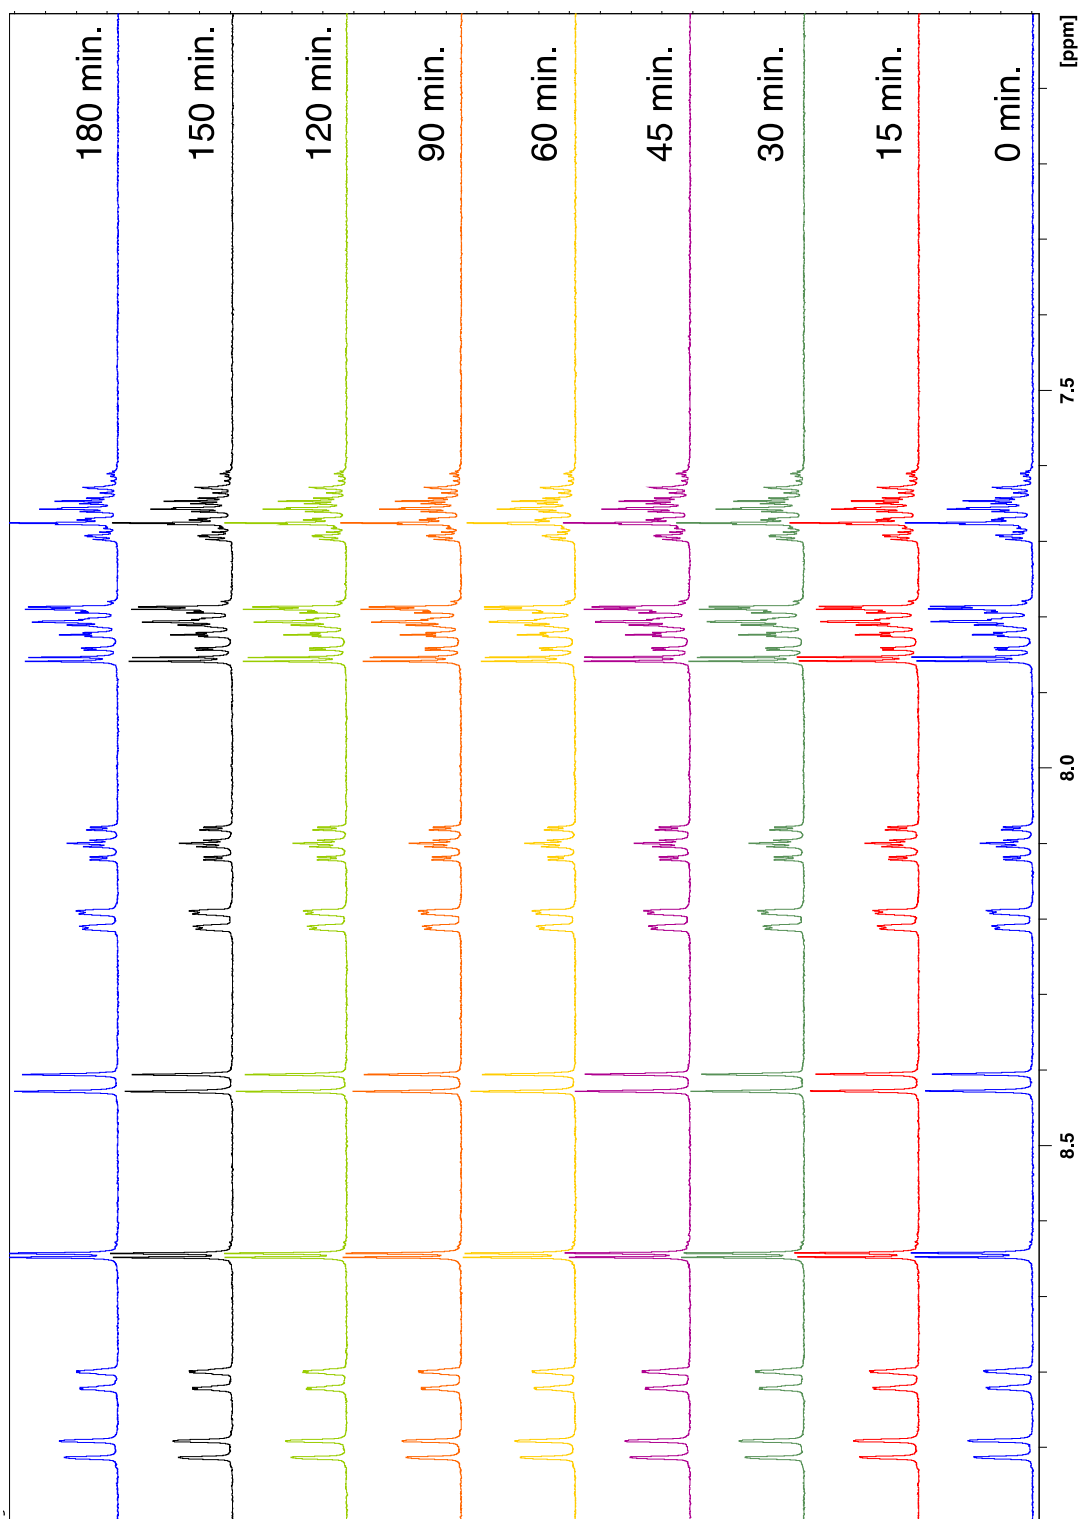

**Figure S26.** Photolysis of **3Br** in a deuterated acetone solution.

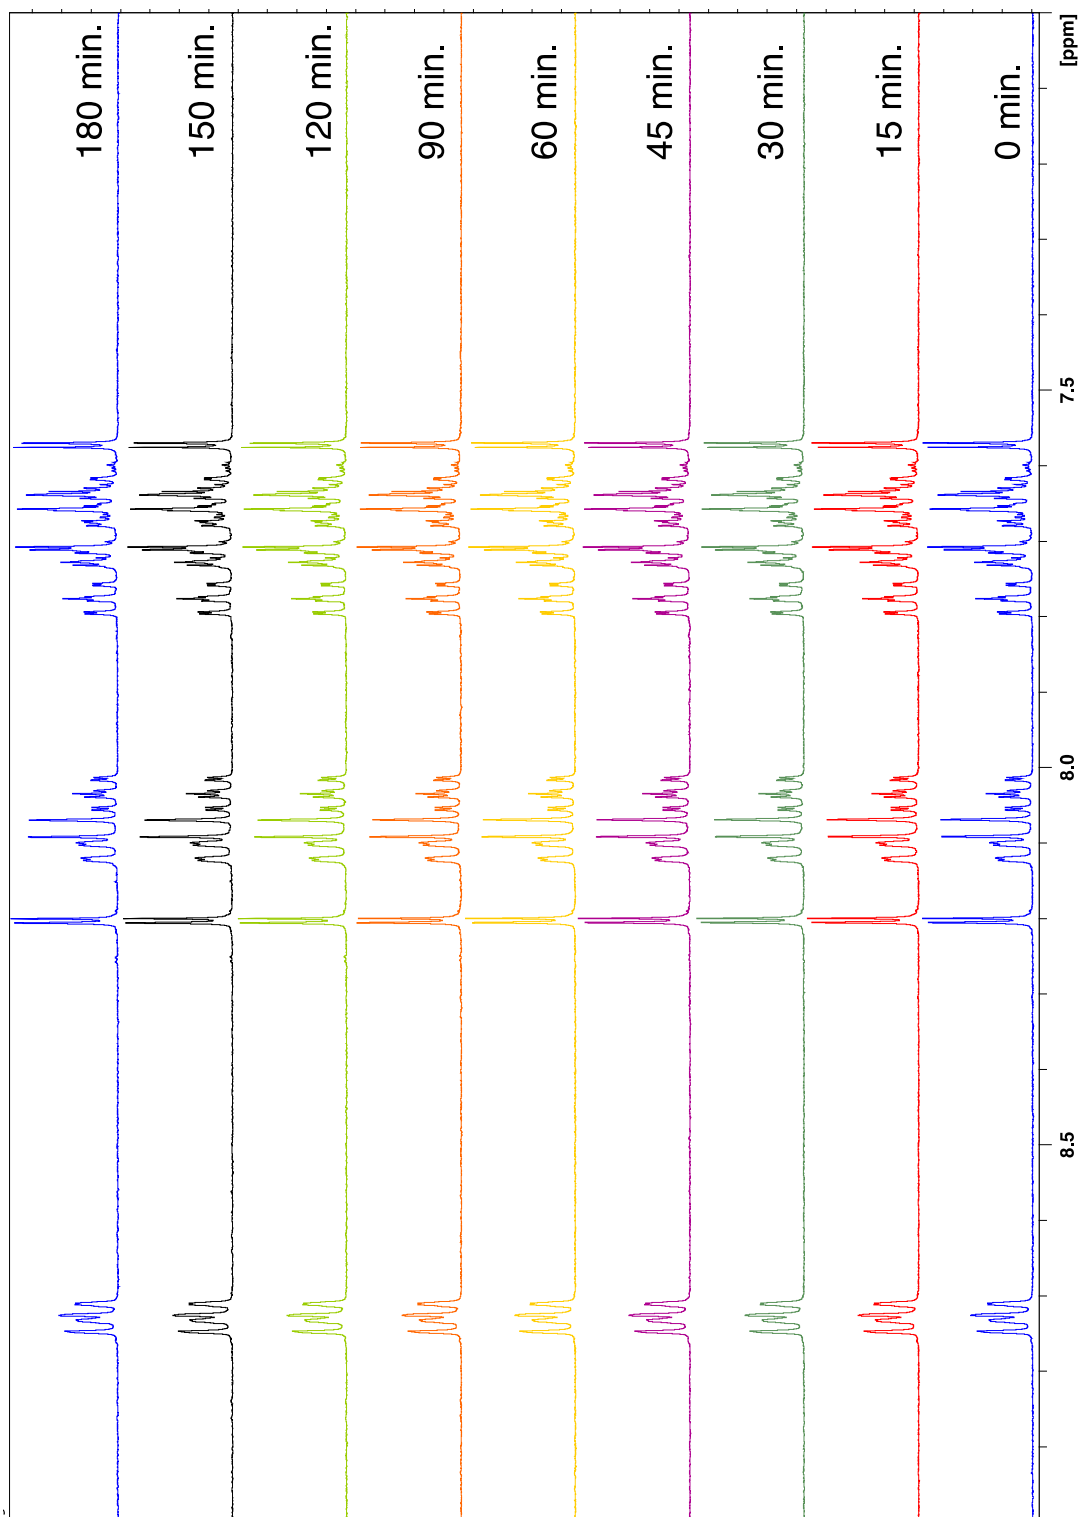

**Figure S27.** Photolysis of **3Br** in a deuterated acetonitrile solution.



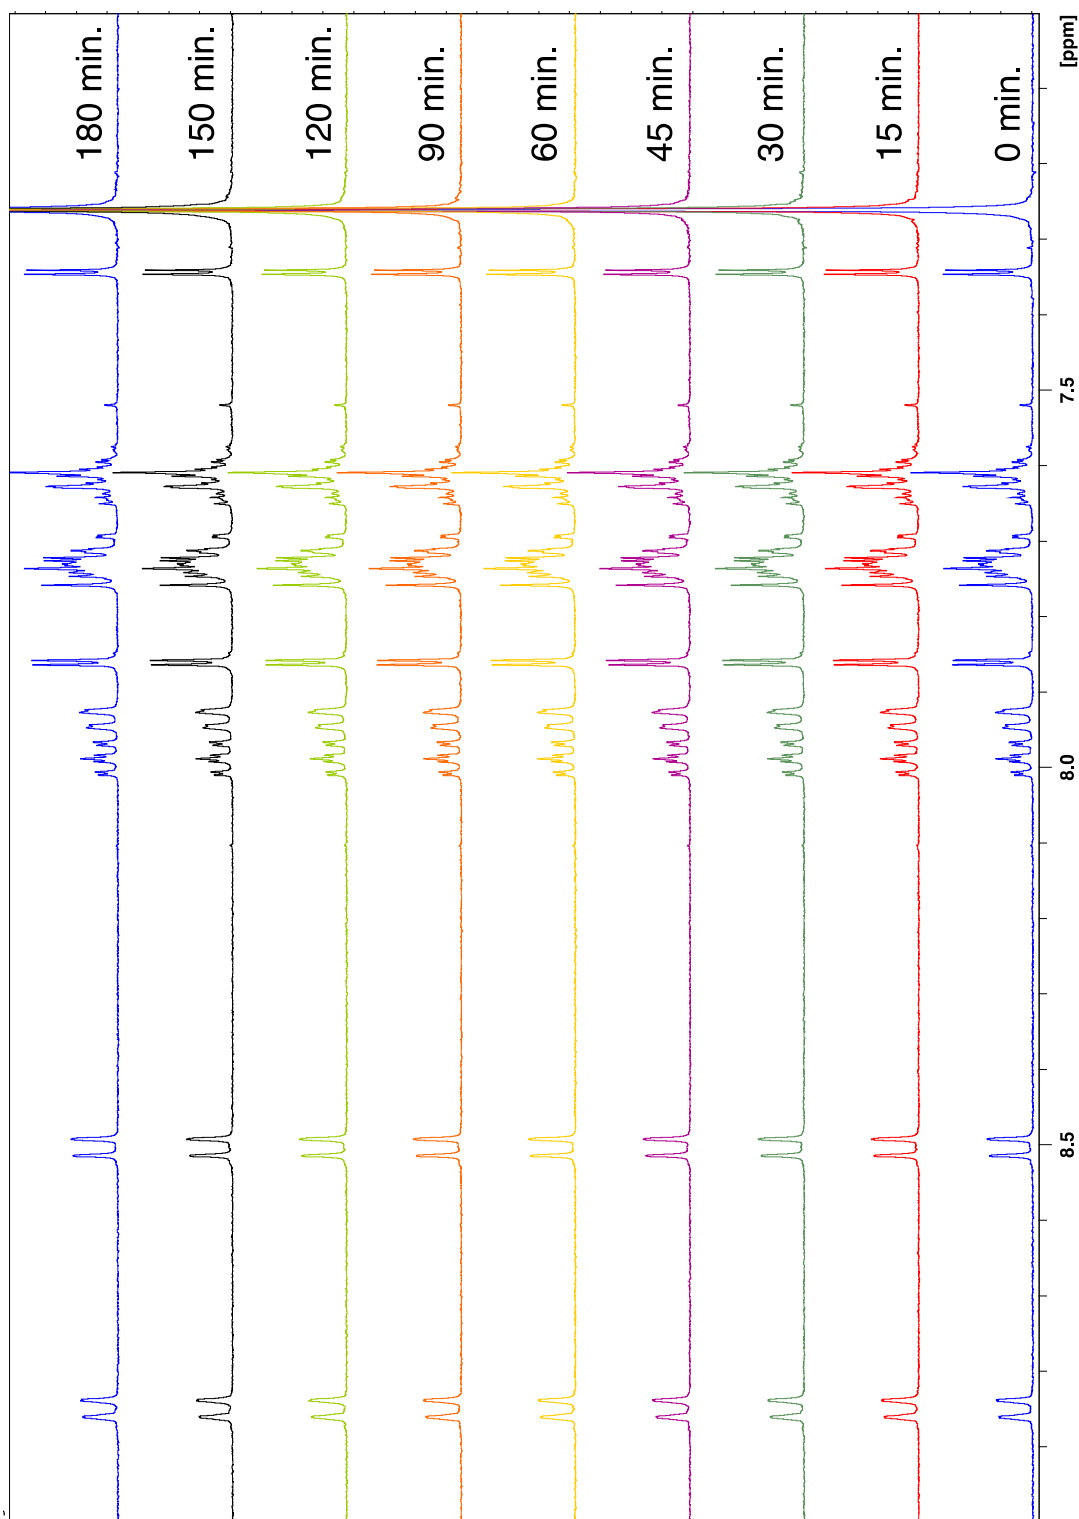

**Figure S28.** Photolysis of **3Br** in a deuterated chloroform solution.

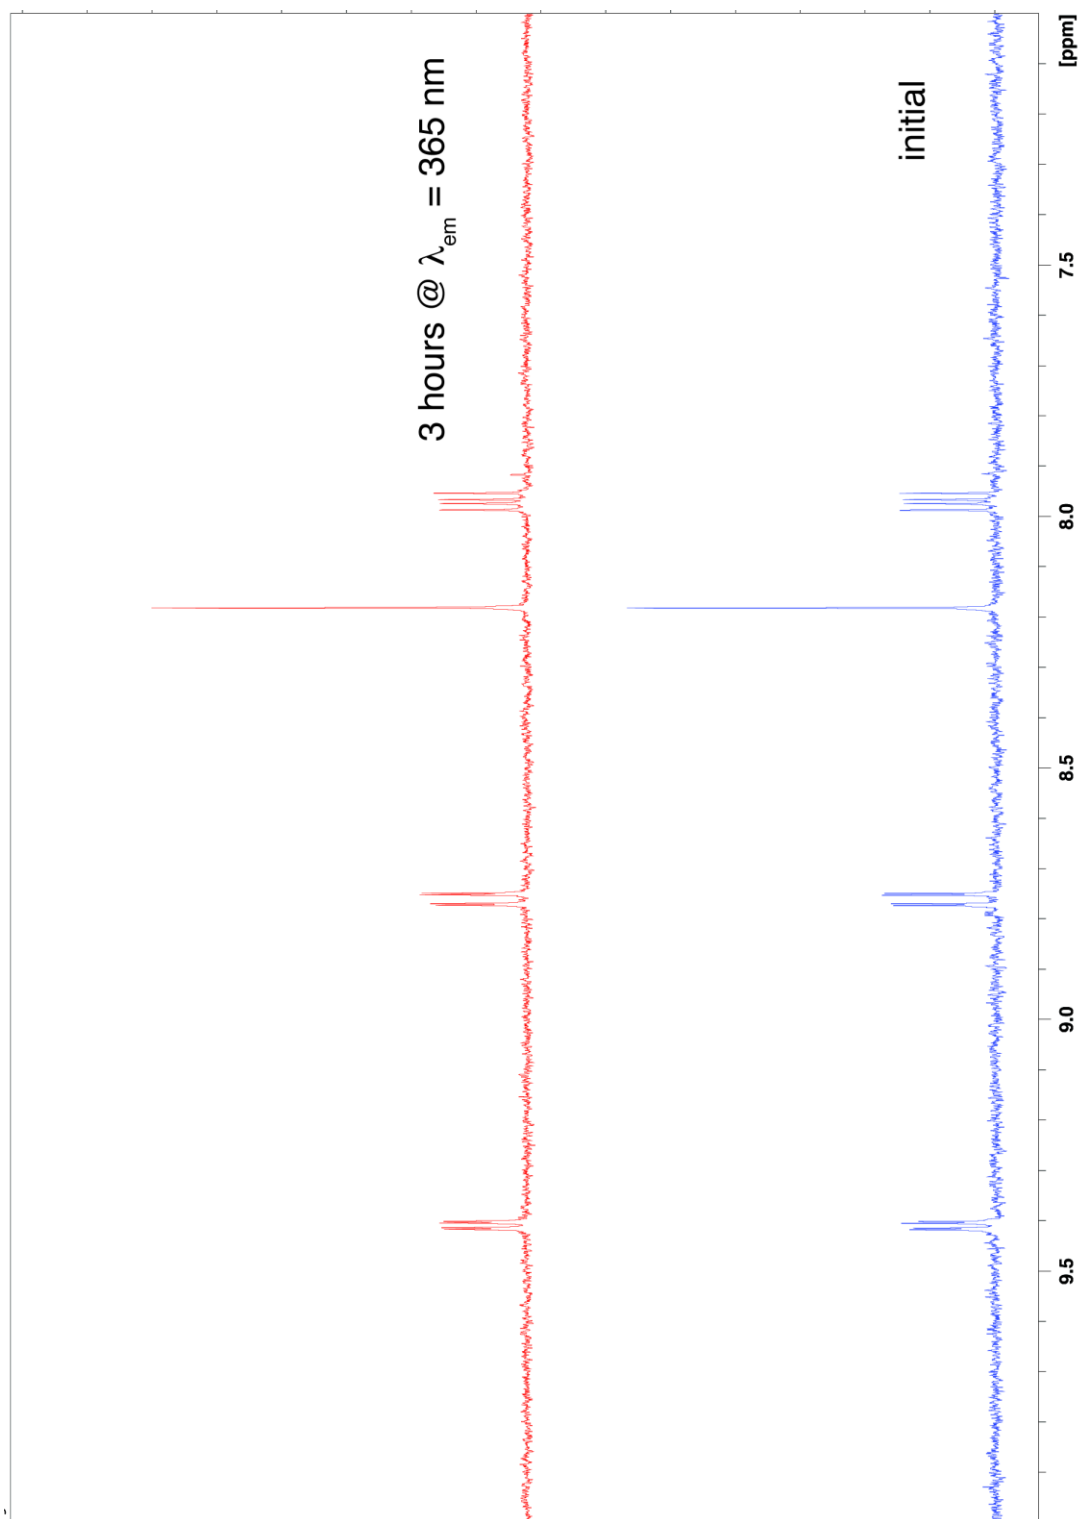

**Figure S29.** Photolysis of *fac*-[Re(CO)<sub>3</sub>(phen)Br] in a deuterated acetonitrile solution.
